# A nucleotide resolution map of Top2-linked DNA breaks in the yeast and human genome

William Gittens\*, Dominic J. Johnson, Rachal M. Allison, Tim J. Cooper, Holly Thomas, and Matthew J Neale\*

Genome Damage and Stability Centre, University of Sussex, UK, BN1 9RQ

\*Correspondence to: [m.neale@sussex.ac.uk](mailto:m.neale@sussex.ac.uk), [w.gittens@sussex.ac.uk](mailto:w.gittens@sussex.ac.uk)

## Abstract

DNA topoisomerases are required to resolve DNA topological stress. Despite this essential role, abortive topoisomerase activity generates aberrant protein-linked DNA breaks, jeopardising genome stability. Here, to understand the genomic distribution and mechanisms underpinning topoisomerase-induced DNA breaks, we map Top2 DNA cleavage with strand-specific nucleotide resolution across the *S. cerevisiae* and human genomes—and use the meiotic Spo11 protein to validate the broad applicability of this method to explore the role of diverse topoisomerase family members. Our data characterises Mre11-dependent repair in yeast, and defines two strikingly different fractions of Top2 activity in humans: tightly localised CTCF-proximal, and broadly distributed transcription-proximal, the latter correlated with gene length and expression. Moreover, single nucleotide accuracy enables us to reveal the influence primary DNA sequence has upon Top2 cleavage—distinguishing canonical DNA double-strand breaks (DSBs) from a major population of DNA single-strand breaks (SSBs) induced by etoposide (VP16) *in vivo*.

## Introduction

DNA topoisomerases are a broad and ubiquitous family of enzymes that tackle topological constraints to replication, transcription, the maintenance of genome structure and chromosome segregation in mitosis and meiosis (Pommier et al., 2016). Although the specific mechanisms by which this is accomplished vary considerably across the family, key aspects are shared: including single or double-strand DNA cleavage to form a transient covalent complex (CC), which allows alteration of the topology of the nucleic acid substrate prior to religation (Wang, 2009). These processes are essential but carry with them a significant risk to genome stability because the CC may be stabilised as a permanent protein-linked DNA break by several physiological factors; such as the proximity of other

36 DNA lesions, the collision of transcription and replication complexes, denaturation of the  
37 topoisomerase, or by the binding of small molecules that inhibit religation (Reviewed in  
38 (Pommier et al., 2016; Nitiss, 2009)). Topoisomerase-induced DNA strand breaks have been  
39 proposed to constitute a significant fraction of the total damage to genomic DNA per day,  
40 and have been linked to the genesis and development of various cancers (Lin et al., 2009;  
41 Haffner et al., 2010), including a subset of therapy-related acute myeloid leukaemias (t-  
42 AML) caused by the use of Topoisomerase 2 (Top2) poisons in the chemotherapeutic  
43 treatment of primary cancers (Rowley and Olney, 2002; Cowell et al., 2012).

44

45 In *S. cerevisiae*, either Top1 or Top2 activity is sufficient to support transcription (Brill et al.,  
46 1987). However, whilst *top1Δ* cells are viable, Top2 is essential for sister chromatid  
47 segregation (Baxter and Diffley, 2008; DiNardo et al., 1984; Holm et al., 1985). In contrast to  
48 *S. cerevisiae*, all known vertebrate species encode two Top2 proteins (TOP2 $\alpha$  and TOP2 $\beta$ ).  
49 Interestingly, whilst TOP2 $\alpha$  is essential for cellular proliferation—cells arrest in mitosis in its  
50 absence (Akimitsu et al., 2003)—TOP2 $\beta$  is not. Rather, TOP2 $\beta$  apparently plays an  
51 important role in promoting transcriptional programmes associated with neuronal  
52 development (Tiwari et al., 2012; Gómez-Herreros et al., 2014), a function that cannot be  
53 supported by TOP2 $\alpha$ .

54

55 Accurate maps of the positions of topoisomerase-DNA covalent complexes (Top2 CCs)  
56 genome-wide and throughout the cell cycle provide insights into topological genome  
57 structural organisation, as well as providing the tools to study their repair should they  
58 become permanent DNA lesions. Whilst the dual catalytic sites present within the  
59 homodimeric Top2 enzyme suggest a primary role in DNA double-strand break (DSB)  
60 formation driven by a biological need for decatenation (Pommier et al., 2016), previous  
61 research has suggested that etoposide and other Top2 poisons may induce a population of  
62 DNA single-strand breaks (SSBs), due to independent inhibition of each active site  
63 (Wozniak and Ross, 1983; Long et al., 1986; Bromberg et al., 2003). Yet, despite the use of  
64 etoposide in chemotherapy, and the different toxicity of these two classes of DNA lesion,  
65 the prevalence of Top2-SSBs remains unclear.

66

67 More recently, general DSB mapping techniques have been applied to map etoposide-  
68 induced lesions (Canela et al., 2017; Yan et al., 2017). However, such methods are only  
69 able to map DSB ends, which therefore excludes and obscures etoposide-induced SSBs.  
70 Moreover, these methodologies lack specificity for protein-linked DNA ends, and require

71 nucleolytic processing to blunt 5' DNA termini as part of sample preparation (Canela et al.,  
72 2017). When combined, these factors lead to loss of nucleotide resolution at the site of  
73 Top2 cleavage.

74

75 To generate a more complete, and direct, picture of topoisomerase action across the  
76 genome, we present here a technique for nucleotide resolution mapping of protein-linked  
77 SSBs and DSBs (referred to collectively here as “Covalent Complexes”; CC), which we  
78 demonstrate to be generally applicable in both yeast and human cell systems. We establish  
79 with high confidence that the technique is able to map both the positions of Top2 CCs and  
80 also CCs of DNA linked to the meiotic recombination protein Spo11, which is related to the  
81 archaeal Topoisomerase VI (Bergerat et al., 1997). Furthermore, we provide insights into the  
82 spatial distribution of human TOP2 CCs, including comparative analysis of their local  
83 enrichment around transcription start sites (TSSs) and CTCF-binding motifs. We find that  
84 TSS-proximal TOP2 CC levels are strongly correlated with transcription, a question that has  
85 come under scrutiny recently (Canela et al., 2017). Finally, we present compelling evidence  
86 that etoposide induces a majority of Top2-linked SSBs *in vivo*, corroborating previous  
87 research and revealing, for the first time, that this is governed by primary DNA sequence at  
88 the cleavage site.

89

## 90 **Results**

### 91 **CC-seq enriches Spo11-linked DNA fragments**

92 To elucidate the *in vivo* functions of topoisomerase-like enzymes, we set out to establish a  
93 direct method (termed ‘CC-seq’) to enrich and map protein-DNA covalent complexes (CC)  
94 genome-wide with nucleotide resolution. Silica fibre-based enrichment of CCs has been  
95 used in the original identification of the meiotic DSB-inducer Spo11 (Keeney and Kleckner,  
96 1995; Keeney et al., 1997). We first verified this enrichment principle using meiotic *sae2Δ*  
97 cells, in which Spo11-linked DSBs accumulate at defined loci due to abrogation of the  
98 nucleolytic pathway that releases Spo11 (Keeney and Kleckner, 1995). To demonstrate  
99 specific enrichment of protein-linked molecules, genomic DNA from meiotic *S. cerevisiae*  
100 cells was isolated in the absence of proteolysis, digested with *Pst*I restriction enzyme, and  
101 isolated on glass-fibre spin columns (Figure 1A, Methods). We used eluted material to  
102 assay a known Spo11-DSB hotspot by Southern blotting (Figure 1B). While DSB fragments  
103 are a minor fraction of input material (~10% of total), and were absent in wash fractions,  
104 DSBs accounted for >99% of eluted material, indicating ~1000-fold enrichment relative to  
105 non-protein-linked DNA (Figure 1B).

106

### 107 **CC-seq maps known Spo11-DSB hotspots genome-wide with high reproducibility**

108 To generate a genome-wide map of Spo11-DSBs, genomic DNA from meiotic *sae2Δ* cells  
109 was sonicated to <400 bp in length, enriched upon the silica column, eluted, and ligated to  
110 DNA adapters in a two-step procedure that utilised the known phosphotyrosyl-unlinking  
111 activity of mammalian TDP2 to uncap the Spo11-bound end (**Figure 1A / Methods**) (**Cortes**  
112 **Ledesma et al., 2009; Johnson et al., 2019**). Libraries were paired-end sequenced and  
113 mapped to the *S. cerevisiae* reference genome (**Table S1**) alongside reads from a previous  
114 mapping technique ('Spo11-oligo-seq') that relies on the isolation of Spo11-linked  
115 oligonucleotides generated in wild-type cells during DSB repair (**Pan et al., 2011**). CC-seq  
116 revealed sharp, localised peaks ('hotspots') in *SPO11+* cells that visually (**Figure 1C**) and  
117 quantitatively (**Figure S1A**,  $r=0.82$ ) correlate with Spo11-oligo seq, and that are absent in  
118 the *spo11-Y135F* control strain in which Spo11-DSBs do not form (**Bergerat et al., 1997**),  
119 demonstrating that signal detected by CC-seq accurately reflects the distribution of Spo11  
120 cleavages. Moreover, CC-seq biological replicates were highly correlated (**Figure S1B**;  $r =$   
121  $0.98$ ), demonstrating high reproducibility. Finally, when analysed at nucleotide resolution,  
122 CC-seq revealed high correlation ( $r = 0.85$ ) between the frequency of Watson-mapping and  
123 Crick-mapping cleavage sites, when offset by a single bp (**Figure 1D and S1C**). This  
124 correlation is expected because of the 2 bp 5' overhang generated at Spo11-DSBs *in vivo*  
125 (**Fig1D**; e.g. (**Liu et al., 1995**))—demonstrating the nucleotide resolution accuracy of CC-  
126 seq, which is further supported by our observation of nucleotide composition preference at  
127 the site of cleavage (**Figure 1E**).

128

### 129 **CC-seq enriches and maps Top2-linked DNA fragments from *S. cerevisiae***

130 Confident in the specificity of CC-seq to map meiotic protein-linked DSBs with high  
131 resolution and dynamic range, we employed CC-seq to characterise within *S. cerevisiae* the  
132 covalent complexes generated naturally by Topoisomerase 2 (Top2) that become stabilised  
133 upon exposure to etoposide, and are thus a proxy for Top2 catalytic activity (**Minocha and**  
134 **Long, 1984; Chen et al., 1984**). Because *S. cerevisiae* is relatively insensitive to etoposide,  
135 we utilised strains ('*pdr1Δ*') in which the action of major drug export pathways are  
136 downregulated due to modulation of *PDR1* activity (**Stepanov et al., 2008**). As expected,  
137 *pdr1Δ* dramatically increased cellular sensitivity to etoposide, which was further enhanced  
138 by mutation of *SAE2* and *MRE11* (**Figure 2A**), factors involved in the repair of covalent  
139 protein-linked DNA breaks (**Neale et al., 2005; Cannavo et al., 2018; Hoa et al., 2016;**  
140 **Hartsuiker et al., 2009**).



141

142 Next, we prepared sequencing libraries from mitotically growing etoposide-treated control,  
143 *sae2Δ*, and *mre11Δ S. cerevisiae pdr1Δ* cells (Table S2). A human DNA spike-in was  
144 included to enable calibration of relative signal between strains (Methods). Replicate  
145 libraries displayed high reproducibility ( $r > 0.89$ ; Figures S2A-C), so were pooled. In  
146 untreated control cells, weak Top2 CC signal was distributed homogeneously across the  
147 genome, with few strong peaks (Figure 2B). Upon etoposide treatment, sharp single-  
148 nucleotide peaks arose at similar locations in all strains (Figure 2B and S2D-E), but with  
149 increased amplitude in the repair mutants—thereby directly linking the MRX pathway to  
150 repair of Top2 CCs in *S. cerevisiae*.

151

152 Global analyses revealed Top2 activity in *S. cerevisiae* to be relatively enriched in divergent  
153 and tandem intergenic regions (IGRs) and depleted in intragenic and convergent IGRs  
154 (Figure 2B and C), similar to, but less pronounced than, the patterns of Spo11 (Figure 2B  
155 and C). Such connections to global gene organisation are likely driven by the need for  
156 Spo11 and Top2 to interact with the DNA helix—an interpretation underpinned by an  
157 anticorrelation with nucleosome occupancy (Figure S1D and S3A). Nevertheless, the fact  
158 that *S. cerevisiae* Top2 CC signal is not correlated with proximal gene expression—neither  
159 in untreated cells, nor following etoposide exposure (Figure S3B)—suggests that in the  
160 gene-dense *S. cerevisiae* genome topological stress may be dealt with by Top2 at sites  
161 dislocated from where it is generated. By contrast, Spo11 activity is positively correlated  
162 with gene expression (Figure S1E), perhaps due to the influence transcription has upon the  
163 generation of higher order chromatin loop structures (Schalbetter et al., 2018), which in turn  
164 are known to pattern Spo11-DSBs (Sun et al., 2015).

165

166 Interestingly, Top2 CC signal remained weakly correlated over greater distances than  
167 Spo11 (Figure 2D), suggesting localised 5-10 kb wide regions of enriched activity—much  
168 larger than Spo11-DSB hotspots (generally <500 bp in size; Figure 1C; (Pan et al., 2011))—  
169 suggesting factors other than just nucleosome occupancy influence local Top2 catalysis.  
170 Top2 CCs are strongly correlated between Watson and Crick strands when offset by 3 bp  
171 (Figure 2E and S2F-K)—as expected for the 4 bp overhang generated by Top2-DSBs—  
172 further demonstrating the nucleotide resolution accuracy of CC-seq. Together these data  
173 describe how CC-seq reveals a strand-specific nucleotide resolution map of etoposide-  
174 induced Top2 CCs.

175

176 **CC-seq maps TOP2 CCs in the Human genome**

177 Having demonstrated that CC-seq is applicable for mapping two divergent types of  
178 topoisomerase-like covalent complexes in *S. cerevisiae*, we applied CC-seq to map TOP2  
179 activity in a human cell system. Asynchronous, sub-confluent RPE-1 cells were treated with  
180 etoposide (VP16) in the presence of MG132 proteasome inhibitor, in order to limit potential  
181 proteolytic degradation of TOP2 CCs that might otherwise hamper enrichment (**Figure 1A**).  
182 Slot-blotting and immunodetection with anti-TOP2 $\beta$  antibody demonstrated complete  
183 recovery of input TOP2 $\beta$ -linked CCs within the column elution, with no TOP2 $\beta$  remaining in  
184 the flow through or being removed by the washes (**Figure 3A**). Eluted material was used to  
185 generate sequencing libraries from three replicate control (-VP16) and four replicate  
186 etoposide-treated samples (+VP16), and high-depth paired-end sequencing reads (**Table**  
187 **S2**) were aligned to the human genome (hg19; **Methods**).

188  
189 Replicates displayed high correlation in the distribution of TOP2 CC signal at broad scale ( $r$   
190 values  $\geq 0.79$ ; **Figure S4A-B**), and so were pooled. Visual inspection revealed that -VP16  
191 and +VP16 signals are spatially-correlated (**Figure 3B**), but that +VP16 signal intensity is  
192 less uniform, with more dynamic range (**Figure S4C-D**). These differences are likely due to  
193 higher signal-to-noise enabled by enrichment of TOP2 CC following VP16 treatment. Like  
194 yeast Top2 libraries (**Figure 2E**), nucleotide resolution analysis of human CC-seq libraries  
195 displayed a skew towards Watson-Crick read-pairs that are offset by 3 bp, as expected for  
196 the 4 bp 5' overhang generated by TOP2 (**Figure S4E**). This skew is much greater in VP16-  
197 treated samples (**Figure S4E**), supporting the view that +VP16 libraries have greater Top2  
198 CC enrichment.

199  
200 The human genome encodes two type-IIA topoisomerases, TOP2 $\alpha$  and TOP2 $\beta$   
201 (**Introduction**). To demonstrate the specificity of CC-seq to map human TOP2 activity we  
202 used CRISPR-Cas9 to generate a human RPE-1-derived cell line with homozygous  
203 knockout mutations in the non-essential *TOP2B* gene, and arrested cells in G1 (**Figure S5A**)  
204 when TOP2 $\alpha$  is not expressed (**Heck et al., 1988; Woessner et al., 1991**). TOP2 $\alpha$  and  
205 TOP2 $\beta$  expression was undetectable in such G1-arrested cells (**Figure S5B**), and  
206 importantly, VP16-induced  $\gamma$ -H2AX foci were reduced  $\sim 7$ -fold relative to wild type control  
207 lines, indicating that most of the signal is TOP2 $\beta$ -dependent (**Figure S5C-D**).

208  
209 Next, we applied CC-seq to asynchronous and G1-arrested wild type and *TOP2B*<sup>-/-</sup> cells. In  
210 G1, VP16 exposure induced localised regions of enriched TOP2 CC formation in wild type

211 cells that were largely diminished or absent in *TOP2B*<sup>-/-</sup> cells (**Figure S5E**). By comparison,  
212 TOP2 $\beta$  deletion did not prevent VP16-induced signal in asynchronous cells (**Figure S5E**), in  
213 which TOP2 $\alpha$  is still present. Together, these results indicate that CC-seq detects a mixture  
214 of both TOP2 $\alpha$  and TOP2 $\beta$  covalent complexes in wild type human cells depending on the  
215 cell cycle phase.

216

### 217 **Spatial distribution of Top2 activity in the human genome**

218 The human genome is divided into a relatively gene-rich ‘A’ compartment and a relatively  
219 gene-poor ‘B’ compartment, the 3D spatial segregation of which can be determined by Hi-  
220 C (Lieberman-Aiden et al., 2009). In both untreated and VP16-treated asynchronous wild  
221 type cells, TOP2 CC are enriched in the active A compartment (**Figure 3B and C**),  
222 consistent with the role of TOP2 in facilitating transcription. TOP2 activity also correlated  
223 with regions of negative DNA supercoiling (Naughton et al., 2013) (**Figure 3B**). These  
224 observations provide a functional link between TOP2 activity, DNA topological stress, and  
225 large-scale chromatin compartments.

226

227 We next focused our attention in more detail on the genome-wide pattern of TOP2 activity  
228 enriched by VP16 treatment. Simple visual inspection (**Figure 3D**) suggested that TOP2 CC  
229 signals are enriched around genome features previously identified as regions of high TOP2-  
230 binding and etoposide-induced DNA strand breakage, including sites of CTCF-binding  
231 (Uusküla-Reimand et al., 2016; Canela et al., 2017) and active transcription start sites  
232 (TSSs) marked by H3K4Me3 and H3K27Ac (Baranello et al., 2014; Yang et al., 2015).

233

234 Genomic maps of etoposide-induced DNA breaks were recently generated using a related  
235 methodology, ‘END-seq’ (Canela et al., 2017), that is not specific for protein-linked TOP2  
236 CC. Aggregating END-seq data around strong CC-seq positions revealed concordant peak  
237 signals at broad scale (**Figure 3E**), demonstrating a general agreement in the positions  
238 reported by the two techniques. However, at finer scale, END-seq positions are offset by 1-  
239 15 bp in the 3’ direction relative to CC-seq positions on each strand (**Figure 3F**)—  
240 something not observed when aggregating CC-seq data around the same loci (**Figure 3F**).  
241 This important difference is likely to be explained by the different populations of DNA  
242 breaks mapped by each technique: specific TOP2 cleavage positions (CC-seq) versus DNA  
243 breaks that have undergone limited nucleolytic resection (END-seq).

244

245 To investigate the relationship between CTCF and TOP2 activity, we filtered CTCF motifs to  
246 include only those that overlapped an RPE-1 CTCF ChIP-seq peak (**Methods; (Akimitsu et**  
247 **al., 2003)**). After aligning Watson and Crick motifs in the same orientation, we frequently  
248 observed a strong TOP2 CC peak upstream of the motif centre and accompanied by more  
249 distal, weaker peaks on both sides of the motif (**Figure 4A and S6A**). Loci containing  
250 multiple CTCF-binding motifs display more complex TOP2 CC patterns (**Figure 4A and**  
251 **S6B**) with enrichment on both sides of the double motif, as would be expected from the  
252 aggregation of a heterogeneous population of CTCF and TOP2 activity present across  
253 different cells.

254

255 We next stratified CTCF motifs into quantiles based on proximal CTCF binding intensity,  
256 and aggregated CC-seq signals centred on these loci (**Figure 4A**). Most Top2 CC signal is  
257 concentrated in two peaks located  $\pm\sim 54$  bp relative to the centre of the CTCF motif, with  
258 the upstream peak  $\sim 2$ -fold more intense (**Fig 4A, middle and bottom panels**). Remaining  
259 Top2 CC signal is focused in a flanking array of weaker peaks. This signal pattern has been  
260 reported recently for VP16-induced DSBs (**Canela et al., 2017**), and has been suggested to  
261 result from a role for TOP2 in facilitating genome organisation by cohesin-dependent loop  
262 extrusion operating in the context of CTCF and other boundary elements. In support of this  
263 interpretation, total aggregated TOP2 CC signal across these regions is positively  
264 correlated with CTCF occupancy as measured by ChIP-seq (**Figure 4A**); interestingly  
265 however, TOP2 CCs were not correlated with interaction strength of associated loops  
266 (**Figure S6C**), annotated previously by Hi-C (**Darrow et al., 2016**). The positions of TOP2 CC  
267 surrounding CTCF motifs anticorrelate with the well-positioned nucleosomes at these sites  
268 (**Figure 4B**). However, such anticorrelation with nucleosome positioning is not a unique  
269 feature of CTCF loci, but is instead a general property of all TOP2 CC sites (**Figure 4C**),  
270 consistent with maps of both Top2 CC (**Figure S3B**) and Spo11 (**Figure S1E; (Pan et al.,**  
271 **2011)**) in *S. cerevisiae*.

272

273 In human cells, etoposide-induced TOP2 CCs are also enriched around gene TSSs (**Figure**  
274 **5**), typically concentrated in broad peaks  $\sim 1$ -2 Kbp downstream and  $\sim 0.5$ -1 Kbp upstream  
275 of the TSS (**Figure 5A; (Yang et al., 2015)**). Similar to elsewhere in the genome, in the region  
276 immediately downstream of the TSS (0-400 bp), TOP2 CC signal anticorrelated with  
277 nucleosome occupancy (**Figure S6D**). Stratifying TSSs based on gene expression  
278 microarray data (**Ganem et al., 2014**) revealed a strong positive correlation (**Figure 5A**)—  
279 something not identified when prior etoposide-induced DSB maps were compared to

nascent transcription as measured by GRO-Seq (Canela et al., 2017). Thus, while human TOP2 activity is correlated with total transcription of the gene, it is not proportional to local RNA polymerase activity when assayed at finer scale—suggesting a model where, as postulated for *S. cerevisiae* (Figure S3A), superhelical stress is resolved at sites dislocated from the process that generates them. Indeed, when analysed with an identical pipeline, both TSS-proximal TOP2 CCs (Figure 5A) and etoposide-induced DSBs (Canela et al., 2017) positively correlate with gene expression (Figure S6E), indicating that this correlation is not due to technical differences in mapping methodologies. Based on the twin-domain model of DNA supercoiling, topological stress is expected to increase not just with gene expression level, but also with increasing gene length (Liu and Wang, 1987). In support of this idea, we observe a strong positive correlation between human TOP2 CC enrichment and gene length independent from gene expression (Figure S7A). Interestingly, no such correlation with gene length is present in *S. cerevisiae* (Figure S7B), further supporting a model whereby, in this compact gene-dense genome, Top2 activity in the IGR is neither directly linked to expression nor length of the proximal gene.

295

Notably, the increased density of etoposide-induced human TOP2 CCs at strongly expressed genes is 2.7-fold greater than at strongly bound CTCF motifs (Figure 5B and C). Thus, whilst strongly-bound CTCF motifs (14,924) greatly outnumber active genes (4,194)—leading, globally, to more TOP2 activity in total at CTCF sites (Figure 5D)—our data reinforce the important role of topoisomerase activity during transcription.

301

### Local DNA sequence and methylation status direct the formation of Top2 CCs

Previous reports suggest that etoposide induces a majority of SSBs, rather than DSBs, due to independent poisoning of each active site in the Top2 homodimer (Bromberg et al., 2003). In our yeast and human datasets, we similarly observe more single-strand Top2 CCs (90.1% and 94.2%, respectively) than double-strand Top2 CCs (9.9% and 5.8%, respectively) following etoposide exposure (Figure 6A and S3C).

308

Prior, fine-scale mapping of Top2 cleavage at specific substrates indicated that cleavage patterns are influenced by local DNA sequence composition (Pommier et al., 1991; Strumberg et al., 1999). To investigate the generality of such findings, and to precisely determine how DNA sequence influences Top2 site preference across the yeast and human genome, we computed the nucleotide resolution average base composition around Top2 CC SSB and DSB sites (Fig 6B)—something made possible by the positional accuracy of

314

315 our mapping technique. For DSBs, average DNA sequence patterns are rotationally  
316 symmetrical around the dyad axis of cleavage (**Figure 6B, left**), consistent with the known  
317 homodimeric nature of eukaryotic Top2 (Pommier et al., 2016). Base positions with notable  
318 skews are restricted to the region  $\pm 11$  bp from the dyad axis ( $p < 10^{-4}$ , Chi-squared test),  
319 consistent with the DNA contacts made by Top2 (Lee et al., 1989; Thomsen et al., 1990;  
320 Wu et al., 2011), yet with minor, species-specific differences at a few positions ( $\pm 2$ ,  $\pm 7$ ,  $\pm 9$ ;  
321 **Figure 6C, top**), suggesting subtle differences in the ScTop2 and HsTOP2 DNA binding  
322 surface. Positions -3 and +3 are the bases immediately 5' to the scissile phosphodiester  
323 bonds cleaved by Top2 (**Figure 6B**). In the averaged DSB sequence motif, strong  
324 preference for cytosine at these positions (69.0% of DSBs) on the scissile strand (**Figure**  
325 **6B, left**) agrees with *in vitro* studies of Top2 mechanism—attributed to favourable base-  
326 stacking interactions of etoposide with guanosine at the -1 position on the non-scissile  
327 strand (Pommier et al., 1991; Strumberg et al., 1999; Wu et al., 2011).

328

329 Importantly, whilst SSBs display similar overall symmetrical sequence features as DSBs,  
330 SSBs differed substantially at position +3, where the strong preference for guanine on the  
331 scissile strand (and paucity of cytosine on the non-scissile strand) is absent (**Figure 6B,**  
332 **right, and Figure 6C, bottom**). Furthermore, the preference for cytosine at the -3 position  
333 on the scissile strand increases to 88.1% for SSBs. This clear difference in sequence bias  
334 provides strong evidence that such positions truly reflect sites of preferred VP16-induced  
335 SSBs vs DSBs *in vivo*.

336

337 The human genome is subject to methylation of cytosine (meC) at CpG sites. Dramatically,  
338 meC completely abolishes the formation of VP16-induced TOP2 CCs (**Figure 6D**),  
339 suggesting this bulky group may interfere sterically with the VP16-Top2-DNA ternary  
340 complex, modifying TOP2 catalysis. Collectively, these observations demonstrate that local  
341 DNA sequence composition—including epigenetic marks—are major determinants of both  
342 TOP2 CC abundance and the differential generation of SSBs and DSBs by VP16 *in vivo*.

343

344

## 345 **Discussion**

346 Topoisomerases are ubiquitous gatekeepers to the genetic material—facilitating changes to  
347 DNA topology, nuclear organisation, and chromosome segregation that are essential for the  
348 generation and propagation of all life on Earth. Yet, topoisomerase dysfunction can also  
349 prove harmful, generating difficult to repair protein-linked DNA breaks that create risks to



350 genome stability. Thus, understanding how, where, and when topoisomerase activity takes  
351 place is of great importance. Here, we demonstrate a robust, technically simple and  
352 sensitive method to map sites of preferred type IIA topoisomerase activity across the  
353 eukaryotic genomes of yeast and human cells at strand-specific nucleotide resolution. Our  
354 methodology joins an extensive toolkit of complementary NGS solutions (Canela et al.,  
355 2017; Crosetto et al., 2013; Yan et al., 2017), each with its own set of unique advantages.  
356 However, many of these techniques do not achieve nucleotide resolution, either due to the  
357 use of nucleolytic processing to blunt 5' DNA termini (Canela et al., 2017), and/or inability to  
358 directly map DNA breaks covalently linked to protein (Canela et al., 2017; Crosetto et al.,  
359 2013; Yan et al., 2017). Here, by utilising the tyrosyl phosphodiesterase activity of  
360 recombinant Tdp2 to unblock 5'-DNA termini non-nucleolytically, we are able to accurately  
361 map the position of not just Top2 CCs, but also related classes of topoisomerase-like  
362 enzymes such as Spo11, which acts uniquely in meiotic cells. Importantly, such specificity  
363 in our cleavage maps enable us to corroborate and extend—with completely independent  
364 methodology—prior research findings from meiosis (Pan et al., 2011), the impact that VP16  
365 has on SSB versus DSB formation—and for the first time demonstrate the influence that  
366 primary DNA sequence composition and methylation status has on the process of Top2  
367 catalysis *in vivo* in both yeast and human cells.

368  
369 Top2 activity has long been associated with transcriptional activity (Yang et al., 2015; Brill  
370 et al., 1987; Baranello et al., 2014; Yu et al., 2017). In addition, recent research has  
371 identified etoposide-induced DSBs that colocalise with a subpopulation of chromatin-  
372 bound TOP2 on the loop-external side of CTCF- and Rad21-bound CTCF motifs (Canela et  
373 al., 2017; Uusküla-Reimand et al., 2016). TOP2 activity at these sites has been proposed to  
374 facilitate genome organisation driven by chromatin loop extrusion, and thereby to constitute  
375 a major fraction of the total nuclear TOP2 activity (Canela et al., 2017). Moreover, contrary  
376 to expectations, the frequency of etoposide-induced DSBs was found to be locally  
377 uncorrelated with nascent RNA levels (Canela et al., 2017)—generating some confusion in  
378 the understanding of where TOP2 activity is most prevalent and most important. Here, our  
379 independent CC-seq method and analyses permit us to revisit this question in explicit  
380 detail, and clarify the role of TOP2 in these processes. Importantly, whilst Top2 activity is  
381 certainly highly enriched at CTCF-bound genomic loci, the total amount of activity at any  
382 given CTCF locus is many times lower than observed at transcriptionally active genes.  
383 Nevertheless, it is critical to emphasise that because of the great abundance of CTCF-

384 bound sites compared to active genes, total aggregated TOP2 activity is globally similar for  
385 CTCF-associated versus transcriptionally active regions of the genome.

386

387 Our data also permit us to investigate how other genomic features influence Top2 activity.  
388 For example, at both TSS and CTCF-proximal regions—and indeed in the wider genome of  
389 both yeast and human—Top2 cleavages are highly enriched in nucleosome-free DNA, in  
390 support of prior findings made at a subset of genomic loci (Capranico et al., 1990; Udvardy  
391 and Schedl, 1991; Käs and Laemmli, 1992). Notably, whilst yeast Top2 activity is also  
392 enriched near TSSs, it is concentrated immediately (120-140 bp) upstream, unlike human  
393 TOP2 activity, which is primarily concentrated in a broader peak 1-2 kb downstream, within  
394 the gene body. Furthermore, unlike human TOP2, yeast Top2 activity is uncorrelated with  
395 downstream gene expression. These differences may stem from the very different scale  
396 and transcriptional organisation of the yeast and human genomes, and the strong  
397 patterning of Top2 activity driven by accessibility to nucleosome-free intergenic promoter  
398 regions in *S. cerevisiae*. In support of this interpretation, similar nucleosomal constraints  
399 appear to substantially govern the activity of the related topoisomerase-like enzyme,  
400 Spo11, during meiosis (Pan et al., 2011) (Figure S1 herein).

401

402 Despite these differences in distribution of Top2 activity at this larger scale, the DNA  
403 sequence preferences for yeast and human Top2 are similar, implying substantial  
404 conservation of the DNA binding interface, which is supported by analysis of the published  
405 crystal structure of VP16-TOP2-DNA (Wu et al., 2011). A nucleotide resolution genome-  
406 wide map of *E. coli* gyrase activity was recently reported (Sutormin et al., 2018), revealing a  
407 sequence motif composed of a central 35 bp region containing the cleavage site, plus two  
408 flanking 47 bp regions with ~10.5 bp periodicity centred ~±40 bp from the site of cleavage,  
409 which are attributed to the known wrapping of proximal DNA around the gyrase C-terminal  
410 domains (Reece and Maxwell, 1991). Strikingly, whilst we observe a core central motif for  
411 Top2, there are no such flanking motifs over these ranges, in agreement with its lack of  
412 DNA wrapping domains (Figure S3D). We do, however, observe two more-proximal  
413 flanking regions centred ~±20 bp from the site of cleavage, each with ~10.5 bp periodicity  
414 (Figure S3E), suggesting that Top2 also bends its DNA substrate—in agreement with a  
415 recent biophysical study (Huang et al., 2017).

416

417 We have used CC-seq to probe MRX-dependent repair of Top2 CCs in *S. cerevisiae*,  
418 corroborating and extending prior genetic experiments in this organism (Hamilton and

419 [Maizels, 2010](#); [Stepanov et al., 2008](#)), and others ([Hoa et al., 2016](#); [Hartsuiker et al., 2009](#)).  
420 Importantly, calibration of our signal using an internal human standard enables the relative  
421 quantification of Top2 CCs, and thus directly demonstrates for the first time that loss of  
422 Mre11 activity increases cellular levels of Top2 CCs in *S. cerevisiae*. The antigen-  
423 independent enrichment step allows calibration to be performed without genetic epitope-  
424 tagging or reconstitution of recombinant protein-DNA complexes, making CC-seq ideally  
425 suited to the future study of repair dynamics.

426

427 We have demonstrated that CC-seq maps CCs of both human TOP2 $\alpha$  and TOP2 $\beta$ —  
428 proteins that are conserved amongst all vertebrates and whose functional differences  
429 remain a subject of interest within the field ([Austin et al., 2018](#)). Given the essential  
430 requirement for TOP2 $\alpha$  during mitosis ([Akimitsu et al., 2003](#)), and the apparent inability of  
431 TOP2 $\beta$  to compensate for its loss ([Grue et al., 1998](#)), it will be particularly interesting to  
432 determine the genomic distribution of TOP2 $\alpha$ /TOP2 $\beta$  activities throughout the cell cycle,  
433 and to relate this to 3D chromatin conformation measured by Hi-C. Whilst not essential for  
434 cell proliferation, TOP2 $\beta$  plays an important role in promoting transcriptional programmes  
435 associated with neuronal development ([Tiwari et al., 2012](#)), and this function cannot be  
436 supported by TOP2 $\alpha$ . Furthermore, loss of TDP2 function inhibits TOP2-dependent gene  
437 transcription and leads to neurological symptoms including intellectual disability, seizures  
438 and ataxia ([Gómez-Herreros et al., 2014](#)). Thus, accurate genomic maps of TOP2 $\beta$  CC  
439 formation in these tissues will help to identify those genes most pertinent to the  
440 development of neurodegeneration. Moreover, as demonstrated by our Spo11 maps, the  
441 antigen-independent, high-efficiency protein-DNA enrichment process makes CC-seq  
442 generally applicable for mapping not just Top2 activity in diverse organisms, but also for  
443 mapping similar types of topoisomerase-DNA covalent complexes, or even those less  
444 distinct DNA-protein crosslinks that arise upon ablation of the DNA-dependent protease  
445 SPRTN/Wss1 ([Stingele et al., 2015](#)).

446

## 447 **Acknowledgements**

448 We thank Keith Caldecott, Antony Oliver and Peter Hornyak for sharing recombinant TDP2,  
449 and Jon Nitiss for sharing the *pdr1* $\Delta$  strains.

450

## 451 **Author Contributions**

452 W.G., D.J. and M.J.N. conceived the project and developed the CC-seq methodology.  
453 W.G., D.J., H.T. and R.A. generated whole genome CC-seq libraries. W.G. performed all

454 data processing and analysis, and all human cell work. D.J., H.T. and R.A. performed yeast  
455 sensitivity and meiotic DSB assays. T.J.C. developed the mapping pipeline and associated  
456 tools. W.G. and M.J.N. interpreted the observations and wrote the manuscript.

457

### 458 **Competing interests**

459 The authors declare no competing financial interests.

460

### 461 **Funding statement**

462 W.G., D.J., R.A., T.J.C., and M.J.N. were supported by an ERC Consolidator Grant  
463 (#311336), the BBSRC (#BB/M010279/1) and the Wellcome Trust (#200843/Z/16/Z).

464

### 465 **Data availability**

466 All strains and cell lines listed in Table S3 and S4 are available on request. Sequencing  
467 reads are available via the NCBI Sequence Read Archive (accession numbers pending).

468

469 **Figure Legends**

470 **Figure 1. CC-seq maps covalent Spo11-linked DNA breaks in *S. cerevisiae* meiosis with**  
471 **nucleotide accuracy**

472 **A)** Schematic of the CC-seq method.

473 **B)** Column-based enrichment of Spo11-linked DNA fragments detected by Southern blotting at the  
474 *his4::LEU2* recombination hotspot (**Methods**). Arrows indicate expected sizes of Spo11-DSBs.

475 **C)** Nucleotide resolution mapping of *S. cerevisiae* Spo11 hotspots by CC-seq or oligo-seq (**Pan et**  
476 **al., 2011**). Red and blue traces indicate Spo11-linked 5' DNA termini on the Watson and Crick  
477 strands, respectively. Grey arrows indicate positions of gene open reading frames.

478 **D)** Pearson correlation ( $r$ ) of Spo11 CC-seq signal between Watson and Crick strands, offset by the  
479 indicated distances.

480 **E)** Average nucleotide composition over a 200 (top) and 30 bp (bottom) window centred on Spo11  
481 breaks. Bases reported are for the top strand only.  
482 HpM = Hits per million mapped reads per base pair.

483

484 **Figure 2. CC-seq maps covalent Top2-linked DNA breaks in *S. cerevisiae* cycling cells with**  
485 **nucleotide accuracy**

486 **A)** Serial dilution spot tests of VP16 tolerance for the indicated strains.

487 **B)** Nucleotide resolution mapping of *S. cerevisiae* Top2 CCs by CC-seq of the indicated strains after  
488 treatment for 4 hours with 1 mM VP16. Spo11-CC data is plotted for comparison. Top2 CC data  
489 were calibrated using a human DNA spike-in (**Methods**). Red and blue traces indicate CC-linked 5'  
490 DNA termini on the Watson and Crick strands, respectively. Grey arrows indicate positions of gene  
491 open reading frames. Lower panels show an expanded view of the region from 31.5 to 40 Kbp.

492 **C)** Quantification of Top2 and Spo11 CC signal stratified by genomic region. The genome was  
493 divided into intra and intergenic regions; the intergenic region was further divided into divergent,  
494 tandem and convergent based on orientation of flanking genes. Spo11 and Top2 activity mapped by  
495 CC-seq is expressed as box-and-whisker plots of density (upper and lower box limit: 3<sup>rd</sup> and 1<sup>st</sup>  
496 quartile; bar: median; upper and lower whisker: highest and lowest values within 1.5-fold of the  
497 interquartile range), or as the percentage of total mapped reads.

498 **D)** Local correlation of Top2 or Spo11 CC-seq signals. Top2 or Spo11 CC-seq data were binned at  
499 50 bp resolution and the Pearson correlation calculated between bins of increasing separation.

500 **E)** Pearson correlation ( $r$ ) of Top2 CC-seq signal on Watson and Crick strands, offset by the  
501 indicated distance.

502 HpM = Hits per million mapped reads per base pair.

503

504 **Figure 3. CC-seq maps TOP2-linked DNA breaks in Human cells with nucleotide accuracy**

505 **A)** Anti-TOP2 $\beta$  western slot blot of input, flow through, wash, and elution fractions. RPE-1 cells were  
506 treated or not with VP16, prior to processing according to **Figure 1A**.

507 **B)** Broad-scale maps of *H. sapiens* TOP2 CCs produced by CC-seq in RPE-1 cells  $\pm$ VP16. Raw data  
508 were scaled, binned, smoothed and median subtracted prior to plotting (**Methods**). Chromatin  
509 compartments revealed by Hi-C eigenvector analysis (**Darrow et al., 2016**), and supercoiling revealed  
510 by bTMP ChIP-seq (**Naughton et al., 2013**) are shown for comparison.

511 **C)** Quantification of TOP2 CC in chromatin compartments A and B. Data are expressed as box-and-  
512 whisker plots of density as for **Figure 2C**.

513 **D)** Fine-scale mapping of *H. sapiens* TOP2 CCs by CC-seq in RPE-1 cells  $\pm$ VP16. Red and blue  
514 traces indicate TOP2-linked 5' DNA termini on the Watson and Crick strands, respectively. Pale  
515 shaded areas are the same data smoothed according to local density (see **Methods**). RPE-1 CTCF  
516 and H3K4Me3 ChIP-seq data plus H3K27Ac ChIP-seq data overlaid from seven cell lines (**ENCODE,**  
517 **2012**) is shown for comparison.

518 **E)** Medium-scale aggregate of END-seq mapped DSBs (**Canela et al., 2017**) surrounding nucleotide  
519 resolution CC-seq mapped TOP2 CCs.

520 **F)** Fine-scale strand-specific aggregate of END-seq mapped DSB ends (red and blue bars) and  
521 nucleotide resolution CC-seq mapped TOP2 CCs (grey bars) surrounding strong TOP2 CC sites.

522

#### 523 **Figure 4. CTCF-proximal TOP2 activity is tightly confined within nucleosome-depleted regions**

524 **A)** Aggregation of TOP2 CCs in a 1 Kbp window centred on orientated CTCF motifs in human RPE-1  
525 cells. Four example CTCF loci are shown orientated in the 5'-3' direction (top). A heatmap of all  
526 CTCF-motifs in the human genome, with 25 rows stratified by the strength of colocalising CTCF  
527 ChIP-seq peaks in RPE-1 cells (middle). The colour scale indicates average TOP2 CC density. Motifs  
528 are also stratified into 4 quartiles of CTCF-binding, and the average TOP2 CC distribution in each  
529 quartile plotted (bottom).

530 **B)** Aggregated TOP2 CC distribution (red line) in the highest quartile of CTCF-binding compared with  
531 the average MNase-seq signal (blue line).

532 **C)** Aggregated TOP2 CC distribution (black and red lines: single-nucleotide resolution and  
533 smoothed, respectively) and the average MNase-seq signal (blue line) surrounding strong TOP2 CC  
534 sites.

535 In (B) and (C) peaks in MNase-seq signal indicate inferred nucleosome positions (blue circles).

536

#### 537 **Figure 5. TSS-proximal TOP2 activity is strongly correlated with gene transcription**

538 **A)** Aggregation of TOP2 CCs in a 10 Kbp window centred on orientated TSSs in human RPE-1 cells.  
539 Four example TSSs are shown orientated in the 5'-3' direction (top). A heatmap of all TSSs in the  
540 human genome, with 25 rows stratified by gene expression level in RPE-1 cells (middle). The colour  
541 scale indicates average TOP2 CC density. Motifs are also stratified into 4 quartiles of gene  
542 expression, and the average TOP2 CC distribution in each quartile plotted (bottom).

543 **B)** Comparison of CTCF-proximal and TSS-proximal TOP2 CC distributions in the highest quartile of  
544 CTCF-binding (pink) and gene-expression (blue), respectively.



545 **C)** Average TOP2 CC density in 10 Kbp regions centred on the highest quartile of TSS, CTCF, or  
546 regions where both features are present. Data are expressed as box-and-whisker plots of density as  
547 in **Figure 2C**. Statistical significance was determined using the KS test.

548 **D)** As in (C) but sum total TOP2 CCs found in these regions.

549

### 550 **Figure 6. Local DNA sequence and methylation status direct the formation of Top2 CCs**

551 **A)** The percentage of strong sites that are SSBs and DSBs in etoposide-treated *S. cerevisiae* and  
552 human cells.

553 **B)** Average nucleotide composition over a 30 bp window centred on the DSB or (inferred) SSB dyad  
554 axis, in etoposide-treated *S. cerevisiae* and human cells. Values reported are for the top strand only.

555 **C)** Heatmaps describing pairwise similarity of nucleotide composition patterns shown in (B). Rows 1-  
556 4 are the absolute differences between: yeast and human SSB patterns, yeast and human DSB  
557 patterns, yeast SSB and DSB patterns, and human SSB and DSB patterns, respectively.

558 **D)** The average number of TOP2 CCs at the +1 position relative to methylated and unmethylated  
559 cytosines in human RPE-1 cells,  $\pm$ VP16. Statistical significance was determined using KS test.

560

## 561 **References**

562

- 563 Akimitsu, N., Adachi, N., Hirai, H., Hossain, M. S., Hamamoto, H., Kobayashi, M., Aratani, Y.,  
564 Koyama, H., and Sekimizu, K. (2003). Enforced cytokinesis without complete nuclear division in  
565 embryonic cells depleting the activity of DNA topoisomerase II $\alpha$ . *Genes Cells* 8, 393-402.
- 566 Austin, C. A., Lee, K. C., Swan, R. L., Khazeem, M. M., Manville, C. M., Cridland, P., Treumann, A.,  
567 Porter, A., Morris, N. J., and Cowell, I. G. (2018). TOP2B: The First Thirty Years. *Int J Mol Sci* 19,  
568 Baranello, L., Kouzine, F., Wojtowicz, D., Cui, K., Przytycka, T. M., Zhao, K., and Levens, D. (2014).  
569 DNA break mapping reveals topoisomerase II activity genome-wide. *Int J Mol Sci* 15, 13111-13122.
- 570 Baxter, J., and Diffley, J. F. (2008). Topoisomerase II inactivation prevents the completion of DNA  
571 replication in budding yeast. *Mol Cell* 30, 790-802.
- 572 Bergerat, A., de Massy, B., Gabelle, D., Varoutas, P. C., Nicolas, A., and Forterre, P. (1997). An  
573 atypical topoisomerase II from Archaea with implications for meiotic recombination. *Nature* 386, 414-  
574 417.
- 575 Brill, S. J., DiNardo, S., Voelkel-Meiman, K., and Sternglanz, R. (1987). Need for DNA topoisomerase  
576 activity as a swivel for DNA replication for transcription of ribosomal RNA. *Nature* 326, 414-416.
- 577 Bromberg, K. D., Burgin, A. B., and Osheroff, N. (2003). A two-drug model for etoposide action  
578 against human topoisomerase II $\alpha$ . *J Biol Chem* 278, 7406-7412.
- 579 Canela, A., Maman, Y., Jung, S., Wong, N., Callen, E., Day, A., Kieffer-Kwon, K.-R., Pekowska, A.,  
580 Zhang, H., Rao, S. S. P., Huang, S.-C., Mckinnon, P. J., Aplan, P. D., Pommier, Y., Aiden, E. L.,  
581 Casellas, R., and Nussenzweig, A. (2017). Genome Organization Drives Chromosome Fragility. *Cell*  
582 170, 507-521.e18.
- 583 Cannavo, E., Johnson, D., Andres, S. N., Kissling, V. M., Reinert, J. K., Garcia, V., Erie, D. A., Hess,  
584 D., Thomä, N. H., Enchev, R. I., Peter, M., Williams, R. S., Neale, M. J., and Cejka, P. (2018).  
585 Regulatory control of DNA end resection by Sae2 phosphorylation. *Nat Commun* 9, 4016.
- 586 Capranico, G., Jaxel, C., Roberge, M., Kohn, K. W., and Pommier, Y. (1990). Nucleosome positioning  
587 as a critical determinant for the DNA cleavage sites of mammalian DNA topoisomerase II in  
588 reconstituted simian virus 40 chromatin. *Nucleic Acids Res* 18, 4553-4559.
- 589 Chen, G. L., Yang, L., Rowe, T. C., Halligan, B. D., Tewey, K. M., and Liu, L. F. (1984).  
590 Nonintercalative antitumor drugs interfere with the breakage-reunion reaction of mammalian DNA  
591 topoisomerase II. *J Biol Chem* 259, 13560-13566.
- 592 Cortes Ledesma, F., El Khamisy, S. F., Zuma, M. C., Osborn, K., and Caldecott, K. W. (2009). A  
593 human 5'-tyrosyl DNA phosphodiesterase that repairs topoisomerase-mediated DNA damage. *Nature*  
594 461, 674-678.

- 595 Cowell, I. G., Sondka, Z., Smith, K., Lee, K. C., Manville, C. M., Sidorczuk-Lesthuruge, M., Rance, H.  
596 A., Padget, K., Jackson, G. H., Adachi, N., and Austin, C. A. (2012). Model for MLL translocations in  
597 therapy-related leukemia involving topoisomerase II $\beta$ -mediated DNA strand breaks and gene  
598 proximity. *Proc Natl Acad Sci U S A* *109*, 8989-8994.
- 599 Crosetto, N., Mitra, A., Silva, M. J., Bienko, M., Dojer, N., Wang, Q., Karaca, E., Chiarle, R.,  
600 Skrzypczak, M., Ginalski, K., Pasero, P., Rowicka, M., and Dikic, I. (2013). Nucleotide-resolution DNA  
601 double-strand break mapping by next-generation sequencing. *Nat Methods* *10*, 361-365.
- 602 Darrow, E. M., Huntley, M. H., Dudchenko, O., Stamenova, E. K., Durand, N. C., Sun, Z., Huang, S.  
603 C., Sanborn, A. L., Machol, I., Shamim, M., Seberg, A. P., Lander, E. S., Chadwick, B. P., and Aiden,  
604 E. L. (2016). Deletion of DXZ4 on the human inactive X chromosome alters higher-order genome  
605 architecture. *Proc Natl Acad Sci U S A* *113*, E4504-12.
- 606 DiNardo, S., Voelkel, K., and Sternglanz, R. (1984). DNA topoisomerase II mutant of *Saccharomyces*  
607 *cerevisiae*: topoisomerase II is required for segregation of daughter molecules at the termination of  
608 DNA replication. *Proc Natl Acad Sci U S A* *81*, 2616-2620.
- 609 ENCODE, P. C. (2012). An integrated encyclopedia of DNA elements in the human genome. *Nature*  
610 *489*, 57-74.
- 611 Ganem, N. J., Cornils, H., Chiu, S. Y., O'Rourke, K. P., Arnaud, J., Yimlamai, D., Théry, M., Camargo,  
612 F. D., and Pellman, D. (2014). Cytokinesis failure triggers hippo tumor suppressor pathway activation.  
613 *Cell* *158*, 833-848.
- 614 Gómez-Herreros, F., Schuurs-Hoeijmakers, J. H., McCormack, M., Grealley, M. T., Rulten, S.,  
615 Romero-Granados, R., Counihan, T. J., Chaila, E., Conroy, J., Ennis, S., Delanty, N., Cortés-  
616 Ledesma, F., de Brouwer, A. P., Cavalleri, G. L., El-Khamisy, S. F., de Vries, B. B., and Caldecott, K.  
617 W. (2014). TDP2 protects transcription from abortive topoisomerase activity and is required for normal  
618 neural function. *Nat Genet* *46*, 516-521.
- 619 Grue, P., Grässer, A., Sehested, M., Jensen, P. B., Uhse, A., Straub, T., Ness, W., and Boege, F.  
620 (1998). Essential mitotic functions of DNA topoisomerase II $\alpha$  are not adopted by topoisomerase  
621 II $\beta$  in human H69 cells. *J Biol Chem* *273*, 33660-33666.
- 622 Haffner, M. C., Aryee, M. J., Toubaji, A., Esopi, D. M., Albadine, R., Gurel, B., Isaacs, W. B., Bova, G.  
623 S., Liu, W., Xu, J., Meeker, A. K., Netto, G., De Marzo, A. M., Nelson, W. G., and Yegnasubramanian,  
624 S. (2010). Androgen-induced TOP2B-mediated double-strand breaks and prostate cancer gene  
625 rearrangements. *Nat Genet* *42*, 668-675.
- 626 Hamilton, N. K., and Maizels, N. (2010). MRE11 function in response to topoisomerase poisons is  
627 independent of its function in double-strand break repair in *Saccharomyces cerevisiae*. *PLoS One* *5*,  
628 e15387.
- 629 Hartsuiker, E., Neale, M. J., and Carr, A. M. (2009). Distinct requirements for the Rad32(Mre11)  
630 nuclease and Ctp1(CtIP) in the removal of covalently bound topoisomerase I and II from DNA. *Mol*  
631 *Cell* *33*, 117-123.
- 632 Heck, M. M., Hittelman, W. N., and Earnshaw, W. C. (1988). Differential expression of DNA  
633 topoisomerases I and II during the eukaryotic cell cycle. *Proc Natl Acad Sci U S A* *85*, 1086-1090.
- 634 Hoa, N. N., Shimizu, T., Zhou, Z. W., Wang, Z. Q., Deshpande, R. A., Paull, T. T., Akter, S., Tsuda,  
635 M., Furuta, R., Tsusui, K., Takeda, S., and Sasanuma, H. (2016). Mre11 Is Essential for the Removal  
636 of Lethal Topoisomerase 2 Covalent Cleavage Complexes. *Mol Cell* *64*, 580-592.
- 637 Holm, C., Goto, T., Wang, J. C., and Botstein, D. (1985). DNA topoisomerase II is required at the time  
638 of mitosis in yeast. *Cell* *41*, 553-563.
- 639 Huang, W. C., Lee, C. Y., and Hsieh, T. S. (2017). Single-molecule Förster resonance energy transfer  
640 (FRET) analysis discloses the dynamics of the DNA-topoisomerase II (Top2) interaction in the  
641 presence of TOP2-targeting agents. *J Biol Chem* *292*, 12589-12598.
- 642 Johnson, D., Allison, R. M., Cannavo, E., Cejka, P., and Neale, M. (2019). Removal of Spo11 from  
643 meiotic DNA breaks in vitro but not in vivo by Tyrosyl DNA Phosphodiesterase 2. *bioRxiv*  
644 <http://dx.doi.org/10.1101/527333>,
- 645 Käs, E., and Laemmli, U. K. (1992). In vivo topoisomerase II cleavage of the *Drosophila* histone and  
646 satellite III repeats: DNA sequence and structural characteristics. *EMBO J* *11*, 705-716.
- 647 Keeney, S., Giroux, C. N., and Kleckner, N. (1997). Meiosis-specific DNA double-strand breaks are  
648 catalyzed by Spo11, a member of a widely conserved protein family. *Cell* *88*, 375-384.
- 649 Keeney, S., and Kleckner, N. (1995). Covalent protein-DNA complexes at the 5' strand termini of  
650 meiosis-specific double-strand breaks in yeast. *Proc Natl Acad Sci U S A* *92*, 11274-11278.
- 651 Lee, M. P., Sander, M., and Hsieh, T. (1989). Nuclease protection by *Drosophila* DNA topoisomerase  
652 II. Enzyme/DNA contacts at the strong topoisomerase II cleavage sites. *J Biol Chem* *264*, 21779-  
653 21787.

- 654 Lieberman-Aiden, E., van Berkum, N. L., Williams, L., Imakaev, M., Ragoczy, T., Telling, A., Amit, I.,  
655 Lajoie, B. R., Sabo, P. J., Dorschner, M. O., Sandstrom, R., Bernstein, B., Bender, M. A., Groudine,  
656 M., Gnirke, A., Stamatoyannopoulos, J., Mirny, L. A., Lander, E. S., and Dekker, J. (2009).  
657 Comprehensive mapping of long-range interactions reveals folding principles of the human genome.  
658 *Science* 326, 289-293.
- 659 Lin, C., Yang, L., Tanasa, B., Hutt, K., Ju, B. G., Ohgi, K., Zhang, J., Rose, D. W., Fu, X. D., Glass, C.  
660 K., and Rosenfeld, M. G. (2009). Nuclear receptor-induced chromosomal proximity and DNA breaks  
661 underlie specific translocations in cancer. *Cell* 139, 1069-1083.
- 662 Liu, J., Wu, T. C., and Lichten, M. (1995). The location and structure of double-strand DNA breaks  
663 induced during yeast meiosis: evidence for a covalently linked DNA-protein intermediate. *EMBO J* 14,  
664 4599-4608.
- 665 Liu, L. F., and Wang, J. C. (1987). Supercoiling of the DNA template during transcription. *Proc Natl*  
666 *Acad Sci U S A* 84, 7024-7027.
- 667 Long, B. H., Musial, S. T., and Brattain, M. G. (1986). DNA breakage in human lung carcinoma cells  
668 and nuclei that are naturally sensitive or resistant to etoposide and teniposide. *Cancer Res* 46, 3809-  
669 3816.
- 670 Minocha, A., and Long, B. H. (1984). Inhibition of the DNA catenation activity of type II topoisomerase  
671 by VP16-213 and VM26. *Biochem Biophys Res Commun* 122, 165-170.
- 672 Naughton, C., Avlonitis, N., Corless, S., Prendergast, J. G., Mati, I. K., Eijk, P. P., Cockroft, S. L.,  
673 Bradley, M., Ylstra, B., and Gilbert, N. (2013). Transcription forms and remodels supercoiling domains  
674 unfolding large-scale chromatin structures. *Nat Struct Mol Biol* 20, 387-395.
- 675 Neale, M. J., Pan, J., and Keeney, S. (2005). Endonucleolytic processing of covalent protein-linked  
676 DNA double-strand breaks. *Nature* 436, 1053-1057.
- 677 Nitiss, J. L. (2009). Targeting DNA topoisomerase II in cancer chemotherapy. *Nat Rev Cancer* 9, 338-  
678 350.
- 679 Pan, J., Sasaki, M., Kniewel, R., Murakami, H., Blitzblau, H. G., Tischfield, S. E., Zhu, X., Neale, M.  
680 J., Jasin, M., Socci, N. D., Hochwagen, A., and Keeney, S. (2011). A Hierarchical Combination of  
681 Factors Shapes the Genome-wide Topography of Yeast Meiotic Recombination Initiation. *Cell* 144,  
682 719-731.
- 683 Pommier, Y., Capranico, G., Orr, A., and Kohn, K. W. (1991). Local base sequence preferences for  
684 DNA cleavage by mammalian topoisomerase II in the presence of amsacrine or teniposide. *Nucleic*  
685 *Acids Res* 19, 5973-5980.
- 686 Pommier, Y., Sun, Y., Huang, S. N., and Nitiss, J. L. (2016). Roles of eukaryotic topoisomerases in  
687 transcription, replication and genomic stability. *Nat Rev Mol Cell Biol* 17, 703-721.
- 688 Reece, R. J., and Maxwell, A. (1991). DNA gyrase: structure and function. *Crit Rev Biochem Mol Biol*  
689 26, 335-375.
- 690 Rowley, J. D., and Olney, H. J. (2002). International workshop on the relationship of prior therapy to  
691 balanced chromosome aberrations in therapy-related myelodysplastic syndromes and acute  
692 leukemia: overview report. *Genes Chromosomes Cancer* 33, 331-345.
- 693 Schalbetter, S. A., Fudenberg, G., Baxter, J., Pollard, K. S., and Neale, M. J. (2018). Principles of  
694 Meiotic Chromosome Assembly. *bioRxiv* <http://dx.doi.org/10.1101/442038>,
- 695 Stepanov, A., Nitiss, K. C., Neale, G., and Nitiss, J. L. (2008). Enhancing drug accumulation in  
696 *Saccharomyces cerevisiae* by repression of pleiotropic drug resistance genes with chimeric  
697 transcription repressors. *Mol Pharmacol* 74, 423-431.
- 698 Stingele, J., Habermann, B., and Jentsch, S. (2015). DNA-protein crosslink repair: proteases as DNA  
699 repair enzymes. *Trends Biochem Sci* 40, 67-71.
- 700 Strumberg, D., Nitiss, J. L., Dong, J., Kohn, K. W., and Pommier, Y. (1999). Molecular analysis of  
701 yeast and human type II topoisomerases. Enzyme-DNA and drug interactions. *J Biol Chem* 274,  
702 28246-28255.
- 703 Sun, X., Huang, L., Markowitz, T. E., Blitzblau, H. G., Chen, D., Klein, F., and Hochwagen, A. (2015).  
704 Transcription dynamically patterns the meiotic chromosome-axis interface. *Elife* 4,
- 705 Sutormin, D., Rubanova, N., Logacheva, M., Ghilarov, D., and Severinov, K. (2018). Single-  
706 nucleotide-resolution mapping of DNA gyrase cleavage sites across the *Escherichia coli* genome.  
707 *Nucleic Acids Res*
- 708 Thomsen, B., Bendixen, C., Lund, K., Andersen, A. H., Sørensen, B. S., and Westergaard, O. (1990).  
709 Characterization of the interaction between topoisomerase II and DNA by transcriptional footprinting.  
710 *J Mol Biol* 215, 237-244.
- 711 Tiwari, V. K., Burger, L., Nikolettou, V., Deogracias, R., Thakurela, S., Wirbelauer, C., Kaut, J.,  
712 Terranova, R., Hoerner, L., Mielke, C., Boege, F., Murr, R., Peters, A. H., Barde, Y. A., and

713 Schübeler, D. (2012). Target genes of Topoisomerase II $\beta$  regulate neuronal survival and are defined  
714 by their chromatin state. *Proc Natl Acad Sci U S A* 109, E934-43.  
715 Udvardy, A., and Schedl, P. (1991). Chromatin structure, not DNA sequence specificity, is the primary  
716 determinant of topoisomerase II sites of action in vivo. *Mol Cell Biol* 11, 4973-4984.  
717 Uusküla-Reimand, L., Hou, H., Samavarchi-Tehrani, P., Rudan, M. V., Liang, M., Medina-Rivera, A.,  
718 Mohammed, H., Schmidt, D., Schwalie, P., Young, E. J., Reimand, J., Hadjur, S., Gingras, A. C., and  
719 Wilson, M. D. (2016). Topoisomerase II beta interacts with cohesin and CTCF at topological domain  
720 borders. *Genome Biol* 17, 182.  
721 Wang, J. C. (2009). *Untangling the double helix* Cold Spring Harbor Laboratory Pr).  
722 Woessner, R. D., Mattern, M. R., Mirabelli, C. K., Johnson, R. K., and Drake, F. H. (1991).  
723 Proliferation- and cell cycle-dependent differences in expression of the 170 kilodalton and 180  
724 kilodalton forms of topoisomerase II in NIH-3T3 cells. *Cell Growth Differ* 2, 209-214.  
725 Wozniak, A. J., and Ross, W. E. (1983). DNA damage as a basis for 4'-demethylepipodophyllotoxin-9-  
726 (4,6-O-ethylidene-beta-D-glucopyranoside) (etoposide) cytotoxicity. *Cancer Res* 43, 120-124.  
727 Wu, C. C., Li, T. K., Farh, L., Lin, L. Y., Lin, T. S., Yu, Y. J., Yen, T. J., Chiang, C. W., and Chan, N. L.  
728 (2011). Structural basis of type II topoisomerase inhibition by the anticancer drug etoposide. *Science*  
729 333, 459-462.  
730 Yan, W. X., Mirzazadeh, R., Garnerone, S., Scott, D., Schneider, M. W., Kallas, T., Custodio, J.,  
731 Wernersson, E., Li, Y., Gao, L., Federova, Y., Zetsche, B., Zhang, F., Bienko, M., and Crosetto, N.  
732 (2017). BLISS is a versatile and quantitative method for genome-wide profiling of DNA double-strand  
733 breaks. *Nat Commun* 8, 15058.  
734 Yang, F., Kemp, C. J., and Henikoff, S. (2015). Anthracyclines induce double-strand DNA breaks at  
735 active gene promoters. *Mutat Res* 773, 9-15.  
736 Yu, X., Davenport, J. W., Urtishak, K. A., Carillo, M. L., Gosai, S. J., Kolaris, C. P., Byl, J. A. W.,  
737 Rappaport, E. F., Osheroff, N., Gregory, B. D., and Felix, C. A. (2017). Genome-wide TOP2A DNA  
738 cleavage is biased toward translocated and highly transcribed loci. *Genome Res* 27, 1238-1249.  
739  
740

## 741 **Methods**

742

### 743 **Yeast strains, culture methods and treatment**

744 The *Saccharomyces cerevisiae* yeast strains used in this study are described in [Table 2](#) and  
745 were derived using standard genetic techniques. Strains used for Spo11 mapping are  
746 isogenic to the SK1 subtype and carry the *sae2Δ::kanMX* gene disruption allele. Strains  
747 used for Top2 mapping are isogenic to the BY4741 subtype and carry the *pdr1DBD-CYC8*  
748 drug sensitivity cassette ([Stepanov et al., 2008](#)). For Spo11 DSB mapping, cells were  
749 induced to undergo synchronous meiosis as follows: Cells were grown overnight to  
750 saturation in 4 ml YPD medium (1% yeast extract, 2% peptone, 2% glucose supplemented  
751 with 0.5 mM adenine and 0.4 mM uracil) at 30 °C, then diluted to OD<sub>600</sub> 0.2 in 200 ml YPA  
752 medium (1% yeast extract, 2% peptone, 1% potassium acetate) and grown vigorously for  
753 15 h at 30 °C. Cells were then washed with water, resuspended in 200 ml sporulation  
754 medium (2% potassium acetate supplemented with diluted amino acids), incubated  
755 vigorously for 6 h at 30 °C and harvested by centrifugation. For etoposide treatment, cells  
756 were grown overnight to saturation in 4 ml YPD medium at 30 °C, then diluted to OD<sub>600</sub> 0.5  
757 in 100 ml YPD and grown until OD<sub>600</sub> 2. 50 ml cultures were then incubated for a further 4 h  
758 in the presence of either 1 mM etoposide or 2% DMSO, before harvesting by  
759 centrifugation.

760

### 761 **Human cell lines, culture methods and treatment**

762 The human cell lines used in this study are described ([Supplementary Table 3](#)). Human  
763 hTERT RPE-1 cells were obtained from ATCC and cultured at 37 °C, 5% CO<sub>2</sub> and 3% O<sub>2</sub> in  
764 Dulbecco's Modified Eagle's Medium DMEM/F-12 (Sigma), supplemented with 10% Fetal  
765 Calf Serum (FCS) and 90 Units/ml Penicillin-Streptomycin. For all experiments (CC-seq,  
766 Slot Blot, WB, IF, FACs) with asynchronous cell populations, RPE-1 cells were seeded at a  
767 density of (3.5x10<sup>3</sup> cells/cm<sup>2</sup>) and incubated for 72 h at 37 °C, to ensure subconfluent log-  
768 phase growth (~70% confluency) at the time of the experiment. For G1 cell populations,  
769 WT and *TOP2B*<sup>-/-</sup> RPE-1 cells were seeded at a density of 5x10<sup>3</sup> cells/cm<sup>2</sup> and incubated for  
770 48 h at 37 °C in DMEM/F12 containing 10% FCS, prior to a further 24 h incubation in  
771 DMEM/F12 medium containing no FCS to ensure complete G1-phase arrest (verified by  
772 FACs, see below). For experiments with proteasome inhibitor and etoposide (CC-seq, Slot  
773 Blot), cells were preincubated with 5 μM MG132 (Sigma) for 90 min, trypsinised and  
774 incubated in suspension with 5 μM MG132 and 100 μM etoposide (Sigma) for 20 min at 37



775 °C. For experiments with etoposide alone (IF), adherent cells were treated with 100 µM  
776 etoposide for 20 min at 37 °C.

777

#### 778 **Generation of *TOP2B*<sup>-/-</sup> RPE-1 cells**

779 The oligonucleotides 5'-CACCGCCGCAGCCACCCGACT and 5'-  
780 AAACAGTCGGGTGGCTGCGGC (identified using Benchling; <https://benchling.com>) were  
781 annealed and cloned into pX330 following BbsI restriction, as described previously (Hsu et  
782 al., 2013). This SpCas9/ trugRNA co-expression plasmid was transiently expressed in RPE-  
783 1 cells to target the 17 bp target sequence GCCGCAGCCACCCGACT (TGG) within exon 1  
784 of *TOP2B*. Single clones were trypsinised and passaged to isolated culture vessels prior to  
785 screening for absent protein by Western Blot (WB). All experiments involving *TOP2B*<sup>-/-</sup> were  
786 conducted using the RPE-1 clone T2B/6, in which no TOP2β is detectable by WB or IF.

787

#### 788 **Spot tests of chronic etoposide sensitivity**

789 Single colonies of each *S. cerevisiae* strain were incubated overnight in 4 ml YPD at 30 °C  
790 with shaking. 0.1 ml of this starter was used to inoculate 4 ml YPD, prior to incubation for 5  
791 hours at 30 °C. Cultures were diluted to make a stock with an OD<sub>600</sub> of 2.0, then this was  
792 10-fold serially diluted five times. Each dilution was spotted onto plates containing 0, 0.1,  
793 0.3 or 1.0 mM VP16, prior to incubation for three days at 30 °C. Plates were imaged on a  
794 2400 Photo scanner (Epson).

795

#### 796 **Southern blotting of meiotic Spo11 DSBs**

797 Approximately 2 µg of genomic DNA (isolated by non-proteolysing Phenol-Chloroform  
798 extraction, as described below) was digested at 37 °C overnight using *Pst*I restriction  
799 enzyme (NEB) in NEBuffer 3.1 (100 mM NaCl, 50 mM Tris Base·HCl pH 7.9, 10 mM MgCl<sub>2</sub>,  
800 100 µg ml<sup>-1</sup> BSA). Additional *Pst*I was added for 4 hours before the addition of NEB purple  
801 loading dye to 1×. Digested samples were proteolysed using 1 mg ml<sup>-1</sup> Proteinase K  
802 (Sigma) at 60 °C for 30 minutes, left to reach room temperature before 10 µg was loaded on  
803 a 0.7% 1× TAE agarose gel (40 mM Tris Base·HCl, 20 mM glacial acetic acid, 1 mM EDTA  
804 pH 8.0) containing 50 µg ml<sup>-1</sup> ethidium bromide. DNA was separated in 1× TAE at 60 V for  
805 18 hours. The gel was imaged using InGenius (Syngene) bioimaging system to check  
806 migration and then exposed to 180 mJ/m<sup>2</sup> UV in the Stratalinker (Stratagene). The gel was  
807 then soaked in three times its volume of denaturation solution (0.5 M NaOH, 1.5 M NaCl) for  
808 30 minutes and then transferred to Zetaprobe (Bio-Rad) membrane by means of a vacuum  
809 at 55 mBar for 2 hours. After transfer the membrane was washed in water ten times and



810 then cross-linked by exposing the membrane to 120 mJ/m<sup>2</sup> UV in the Stratalinker. The  
811 membrane was incubated in 30 ml of hybridisation buffer (0.5 M NaHPO<sub>4</sub> buffer pH 7.5, 7%  
812 SDS, 1 mM EDTA, 1% BSA) at 65 °C for 1 hour. The *MXR2* probe for looking at the  
813 *HIS4::LEU2* locus was created from 50 ng of template DNA, 0.1 ng of Lambda DNA (NEB)  
814 digested with *BstEII* (NEB), and water. The mix was denatured at 100 °C for 5 minutes then  
815 put on ice. High Prime (Roche) was added in addition to 0.5-3 mBq of α-<sup>32</sup>P dCTP and  
816 incubated at 37 °C for 15 minutes. 30 µl 1× TE was added and the probe spun through a G-  
817 50 spin column (GE Healthcare) at 400 × *g* for 2 minutes. The probe was then denatured by  
818 incubating at 100 °C for 5 minutes and then put on ice before being added to 20 ml  
819 hybridisation mixture. The original 30 ml hybridisation buffer was discarded and the 20 ml  
820 containing the probe was added to the membrane and incubated overnight at 65 °C. After  
821 incubation, the membrane was washed five times with 100 ml pre-warmed Southern wash  
822 buffer (1% SDS, 40 mM NaHPO<sub>4</sub> buffer pH 7.5, 1 mM EDTA) and exposed to phosphor  
823 screen overnight.

824

### 825 **Western blotting**

826 Whole human cell extracts (WCE) were harvested by direct lysis in 1x Laemmli loading  
827 buffer, denatured for 10 min at 95 °C and sonicated for 30 s using Bioruptor® Pico.  
828 Samples were subjected to SDS-PAGE (7% or gradient gel) and transferred to  
829 nitrocellulose membrane. Primary immunodetection was with antibodies targeting TOP2β  
830 (Clone 40, BD Biosciences), TOP2α (ab52934, Abcam), or Ku80 (ab80592, Abcam).  
831 Secondary immunodetection was with HRP-conjugated Rabbit anti-Mouse IgG  
832 (ThermoFisher), prior to detection of peroxidase activity using ECL reagent and X-Ray film  
833 (Scientific Laboratory Supplies Ltd).

834

### 835 **Slot blotting**

836 Samples were diluted 4-fold (500 µL total volume) in NaPO<sub>4</sub> buffer (25 mM, pH 6.5), and slot  
837 blotted onto 0.2 µM nitrocellulose membrane (Amersham), using the Minifold I (Whatman)  
838 manifold. The wells were washed twice with 750 µL NaPO<sub>4</sub> buffer. The membrane was then  
839 blocked with 10% milk-TBST for 1 h at RT, prior to incubation overnight with anti-TOP2β  
840 antibody (Clone 40, BD Biosciences) at 4 °C. The membrane was washed 4 times with  
841 TBST, incubated with HRP-conjugated Rabbit anti-Mouse IgG (ThermoFisher) for 1 h at RT,  
842 washed 4 times with TBST, and incubated with ECL detection reagent for 1 min. X-Ray film  
843 was used for detection.

844

845 **Fluorescence-Assisted Cell Sorting (FACS)**

846 Approximately 10 million RPE-1 cells were trypsinised, washed once in PBS and  
847 resuspended in 1.5 ml PBS. 3.5 ml ethanol was added dropwise to pellet, with vortexing.  
848 Cells were fixed for 1 hr at 4 °C, prior to centrifugation and aspiration of the supernatant.  
849 Cells were washed twice with PBS, prior to resuspension in 0.5 ml 0.25% Triton-X100-PBS  
850 for 15 min on ice. Cells were pelleted by centrifugation, supernatant was aspirated, and the  
851 pellet was resuspended in 0.5 ml TBS containing 10 ug/ml RNase A (Sigma) and 167 nM  
852 Sytox Green (ThermoFisher). After 30 min incubation in the dark at RT, the suspension was  
853 filtered through fine mesh into test tubes. DNA content in 50,000 cells was analysed using  
854 the Accuri C6 (BD Biosciences), with gating to exclude doublets and cell debris.

855

856 **Immunofluorescence**

857 Cells were seeded onto glass coverslips (Agar Scientific), incubated and treated according  
858 to the protocol outlined above. Cells were then fixed with 4% paraformaldehyde PBS for 10  
859 min, washed three times with PBS, permeabilised with 0.2% Triton-X100-PBS for 10 min,  
860 blocked for 1 h with 10% FCS-PBS, incubated with primary antibodies targeting Phospho-  
861 Histone H2AX (S139) (JBW-301, Merck Millipore) and TOP2 $\alpha$  (ab52934, Abcam), washed  
862 three times with PBS, incubated with secondary antibodies Alexa 488-conjugated Goat  
863 anti-mouse IgG (Fisher) and Alexa 647-conjugated Goat anti-Rabbit (Fisher), washed three  
864 times with PBS, washed once with distilled water, and mounted with VECTASHIELD  
865 containing DAPI (Vector Laboratories).

866

867 **High-content microscopy**

868 Automated wide-field microscopy was performed on an Olympus ScanR system (motorised  
869 IX83 microscope) with ScanR Image Acquisition and Analysis Software, 40x/0.6  
870 (LUCPLFLN 40x PH) dry objectives and Hamamatsu ORCA-R2 digital CCD camera  
871 C10600. Numbers of anti-phospho-Histone H2AX (S139) foci (Alexa 488; FITC filter) were  
872 quantified in the nuclear region colocalising with DAPI, using Olympus ScanR Analysis  
873 software. TOP2 $\alpha$  signal (Alexa 647; Cy5 filter) was also quantified in this region.

874

875 **CC-seq: Enrichment of protein-linked DNA**

876  $1.5 \times 10^7$  RPE-1 cells were treated as described above, pelleted by centrifugation, washed  
877 once with 15 ml ice-cold PBS, and resuspended in three aliquots of 400  $\mu$ L ice-cold PBS.  
878  $1 \times 10^9$  yeast cells were treated as described above, then spheroplasted in 1.5 ml  
879 spheroplasting buffer (1 M sorbitol, 50 mM NaHPO<sub>4</sub> buffer pH 7.2, 10 mM EDTA) containing

880 200 µg/ml Zymolyase 100T (AMS Biotech) and 1% β-mercaptoethanol (Sigma) for 20 min at  
881 37 °C. 2 µL Protease Inhibitor Cocktail and 2 µL Pefabloc (Sigma) were added before  
882 splitting into five aliquots of 400 µL. All subsequent steps of the protocol are the same for  
883 yeast and human samples. 1 ml ice-cold ethanol was added to 400 µL cell suspensions in  
884 microcentrifuge tubes, mixed, incubated for 10 min on ice, and pelleted by centrifugation.  
885 The supernatant was thoroughly removed by aspiration, prior to addition of 200 µL 1x STE  
886 buffer (2% SDS, 0.5M Tris pH 8.1, 10 mM EDTA, 0.05% bromophenol blue), cell disruption  
887 using a pestle (VWR), addition of a further 400 µL 1x STE buffer, and incubation for 10 min  
888 at 65 °C. Samples were cooled on ice and 500 µL Phenol-Chloroform-isoamyl alcohol  
889 (25:24:1; Sigma) was added. The mixtures were emulsified by shaking and pipetting 5 times  
890 with a 1 ml micropipette, prior to phase separation by centrifugation at 20,000 g for 20 min.  
891 By minimising mechanical shearing of the lysate prior to phenol chloroform extraction,  
892 peptides that are covalently linked to high molecular weight DNA segregate into the  
893 aqueous phase. 500 µL of the aqueous phase was removed to a clean microcentrifuge tube  
894 and nucleic acids were precipitated with 1 ml ice-cold ethanol, pelleted by centrifugation,  
895 washed with ice-cold 70% ethanol, and dissolved in TE buffer overnight at 4 °C. Samples  
896 were then incubated with 0.2 mg/ml RNase A (Sigma) for 1 h at 37 °C; nucleic acids were  
897 precipitated with 1 ml ethanol, pelleted by centrifugation, washed twice with 70% ethanol  
898 and dissolved in TE overnight. Aliquots were combined to a total of 1 ml and sonicated to  
899 an average fragment size of 300-400 bp with Covaris (duty cycle: 10%, intensity/peak  
900 power incidence: 75W, cycles/burst: 200, time: 15 min). 1 ml of sonicated sample was  
901 added to 1.2 ml of binding buffer (10 mM Tris pH 8.1, 10 mM EDTA, 0.66 M NaCl, 0.22%  
902 SDS, 0.44% N-Lauroylsarcosine sodium salt). Each sample was divided over several  
903 Miniprep (QIAGEN) silica-fibre membrane spin columns, such that the total DNA loaded to  
904 each was approximately 20 µg. The flowthrough was reapplied to the column to improve  
905 binding. Columns were washed 6 times with 600 µL of TEN (10 mM Tris, 1 mM EDTA, 0.3 M  
906 NaCl) per 1 min wash, prior to elution with 100 µL TES (10 mM Tris, 1 mM EDTA, 0.5%  
907 SDS).

908

#### 909 **CC-seq: DNA end repair and adapter ligation**

910 Eluted products were pooled to 500 µL in TES and incubated with 1 mg/ml Proteinase K  
911 (Sigma) for 30 min at 60 °C, prior to overnight ethanol precipitation at -80 °C with 1.41 ml  
912 ethanol, 0.2 mg/ml glycogen and 200 mM NaOAc. The DNA-glycogen precipitate was  
913 pelleted by centrifugation at 20,000 g for 1 hr at 4 °C, washed once with 1.5 ml 70%  
914 ethanol, and re-pelleted by centrifugation. The supernatant was aspirated and the pellet

915 was air-dried for 10 min at RT, prior to solubilisation in 52  $\mu$ L 10 mM Tris-HCl. DNA  
916 concentration was measured in a 2  $\mu$ L sample with the Qubit (ThermoFisher) and High  
917 Sensitivity reagents. The remaining 50  $\mu$ L was used as input for one round of end repair  
918 and adapter ligation with NEBNext Ultra II DNA Library Preparation kit (NEB), according to  
919 manufacturer's instructions, except for the use of a custom P7 adapter (see table). The use  
920 of custom adapters is to allow differentiation of the sheared end (P7 adapter) from the  
921 Top2/Spo11 end (P5 adapter). After ligation of the P7 adapter, DNA was isolated with  
922 AMPure XP beads (Beckman Coulter) according to manufacturer's instructions (beads:input  
923 of 78:90) and eluted in 50  $\mu$ L 10 mM Tris-HCl. Samples were diluted 2-fold with 50  $\mu$ L Tdp2  
924 reaction buffer (100 mM TrisOAc, 100 mM NaOAc, 2 mM MgOAc, 2 mM DTT, 200  $\mu$ g/ml  
925 BSA) and incubated with 3  $\mu$ L of 10  $\mu$ M recombinant human TDP2 (Hornyak et al., 2016;  
926 Johnson et al., 2019), for 1 h at 37  $^{\circ}$ C. DNA was isolated again with AMPure XP beads  
927 (beads:input of 103:103) and eluted in 52  $\mu$ L 10 mM Tris-HCl. Next, a second round of end  
928 repair and adapter ligation was conducted, using adapter P5 (see table). After ligation of  
929 the P5 adapter to the Top2/Spo11-cleaved end, DNA was isolated with AMPure XP beads  
930 (beads:input of 78:90) and eluted in 17  $\mu$ L 10 mM Tris-HCl.

931

#### 932 **CC-seq: PCR and size selection**

933 DNA concentration was measured in 2  $\mu$ L using the Qubit. The remaining 15  $\mu$ L was used  
934 as template for the PCR step of the NEBNext Ultra II PCR step using universal primer (P5  
935 end) and indexed primers for multiplexing (P7 end), according to manufacturer's  
936 instructions. PCR reactions were diluted with 50  $\mu$ L 10 mM Tris-HCl, DNA was isolated with  
937 AMPure XP beads (beads:input of 84:100) and eluted in 30  $\mu$ L 1 mM Tris-HCl pH 8.1.  
938 Samples were then subjected to 200-600 bp size selection using the BluePippin (Sage  
939 Science), prior to quantification of molarity using the Bioanalyzer (Agilent).

940

#### 941 **CC-seq: NGS and data pipeline**

942 Multiplexed library pools were sequenced on the Illumina MiSeq (Kit v3 - 150 cycles) or  
943 Illumina NextSeq 500 (Kit v2 - 75 cycles), with paired-end read lengths of 75 or 42 bp,  
944 respectively. Paired end reads that passed filter were aligned using bowtie2 (options: -X  
945 1000 --no-discordant --very-sensitive --mp 5,1 --np 0), using MAPQ0 settings for yeast or  
946 MAPQ10 settings for human experiments, then SAM files processed by the custom-built  
947 Perl program termMapper that computes the coordinates of the protein-linked 5'-terminal  
948 nucleotide. The reference genomes used in this study are hg19 (human), and Cer3H4L2 (*S.*  
949 *cerevisiae*), which we generated by inclusion of the *his4::LEU2* and *leu2::hisG* loci into the

950 Cer3 yeast genome build. Yeast data sets were filtered to exclude long terminal repeats,  
951 retrotransposons, telomeres, and the rDNA. Human datasets were filtered to remove known  
952 ultra-high signal regions (Hoffman et al., 2013; ENCODE, 2012) and repeat regions  
953 (ENCODE, 2012). All subsequent analyses were performed in R (Version 3.4.3 ) using  
954 RStudio (Version 1.1.383), unless indicated otherwise.

955

#### 956 **CC-seq: Calibrated library generation**

957 Calibration of Top2 CC-seq experiments was conducted to allow comparison of relative  
958 peak intensities in different yeast strains. This was achieved by spike-in of human DNA  
959 following the sonication stage of the protocol, which is a method that has been used to  
960 calibrate other sequencing methods (Hu et al., 2015; Grzybowski et al., 2015). *S. cerevisiae*  
961 and RPE-1 cells were exposed to etoposide and processed until just after sonication,  
962 exactly as according to the cell treatment and CC-seq protocols above. DNA concentration  
963 was quantified by Qubit, and then mixed at a molar ratio of human DNA:yeast DNA of  
964 1:100. All subsequent stages of the protocol were identical, except read alignment, for  
965 which we used both hg19 and Cer3H4L2 builds successively. Cer3H4L2-aligned peak  
966 heights were corrected in each sample by multiplying by the reciprocal fraction of human  
967 reads in that sample.

968

#### 969 **CC-seq: Fine-scale mapping**

970 Fine-scale (nucleotide resolution) maps of Spo11/Top2 CCs were produced as simple  
971 histograms over a specified region (Figures 1B, 2B, 3D, 4A, 5A, S1A, S3A, S5A and S5B).  
972 Dark red and blue line heights indicate numbers of 5'-terminal nucleotides detected at that  
973 position on the Watson and Crick strands, in units of HpM. Where indicated in the figure  
974 caption, smoothed data are also plotted as pale red and blue polygons, in addition to the  
975 unsmoothed nucleotide resolution data. This smoothing was either applied using a sliding  
976 Hann window of the indicated width, or using a custom smoothing function (VarX), as  
977 indicated in the figure caption.

978

#### 979 **CC-seq: Broad-scale mapping**

980 Broad-scale maps of Top2 CCs were produced by binning nucleotide resolution data at 10  
981 Kbp (Figure 3B) or 100 Kbp (Figure S4D) resolution. Binned data were either plotted  
982 directly (Figure S4D); or first scaled according to the estimated noise fraction (see below),  
983 smoothed with a 10-bin Hanning window, and median subtracted (Figure 3B).

984

985 **CC-seq: Estimation of the noise fraction in Human datasets**

986 The noise fraction in each sample was estimated using an adaptation of the previously  
987 published NCIS method (Liang and Keleş, 2012). Briefly: the data for -VP16 and +VP16  
988 samples were first binned at 10 Kbp resolution. Then the subpopulation of bins with the  
989 lowest TOP2 CC signal was identified in each sample. The average signal density of this  
990 subpopulation of bins, in each sample, was defined as the noise density ( $d_{-VP16}$  and  $d_{+VP16}$ ).  
991 Signal in the -VP16 sample was scaled by a normalisation factor equal to:

992

$$993 \quad r = \frac{d_{+VP16}}{d_{-VP16}}$$

994

995 **CC-seq: Quantification of Spo11 and Top2 activity in defined genomic regions**

996 Yeast Spo11 hotspots were the same as defined previously (Pan et al., 2011). Yeast  
997 intra/intergenomic regions were defined based on TSS and TTS coordinates reported on  
998 the Saccharomyces Genome Database (<https://www.yeastgenome.org>). Human chromatin  
999 compartments A and B were defined based on eigenvector analysis of previously published  
1000 100 kb resolution RPE-1 Hi-C data (Darrow et al., 2016) using the Juicer package  
1001 (Lieberman-Aiden et al., 2009; Durand et al., 2016). Human “CTCF” and “TSS” regions were  
1002 defined as 10 kb regions centred on the top quartile of expressed TSSs or the midpoint of  
1003 top quartile CTCF-bound CTCF-binding motifs, with overlaps merged using  
1004 GenomicFeatures::reduce. The “Both” region was defined as the intersection of the “TSS”  
1005 and “CTCF” regions using GenomicFeatures::intersect. This region was then excluded from  
1006 the individual “TSS” and “CTCF” regions. The “Neither” region was defined as regions of  
1007 hg19 which overlapped neither “TSS”, nor “CTCF”, nor “Both”, using  
1008 GenomicFeatures::gaps. Nucleotide resolution data was tallied within defined regions, and  
1009 is expressed as an aggregate (bar plots) in which the signal is corrected using the average  
1010 signal in the “Neither” compartment, and/or as the distribution of region signal densities  
1011 (box-and-whisker plot), as indicated in figure captions.

1012

1013 **CC-seq: Correlation of Watson/Crick cleavage positions**

1014 Nucleotide resolution human TOP2 data was thresholded at 0.01 HpM. Nucleotide  
1015 resolution yeast Top2 and Spo11 data were not thresholded. Peak coordinates on the Crick  
1016 strand were offset over the range -100 to +100, relative to Watson coordinates. After each  
1017 offset, the data was filtered to include only sites with both Watson and Crick hits. The



1018 Pearson correlation ( $r$ ) between the Watson and Crick signal intensities in these  $n$  sites was  
1019 calculated. We also counted the fraction of reads found within these  $n$  sites, and  
1020 normalised this number over the -100 to +100 bp range. Data are expressed as R values  
1021 and/or normHpM values, as indicated in the figure captions.

1022

### 1023 **CC-seq: Aggregation of CC-seq data around loci of interest**

1024 Nucleotide resolution CC-seq data (line-plots) or binned CC-seq data (heatmaps) were  
1025 aggregated within regions of specified size, centred on the loci of interest. The resulting  
1026 sum total HpM was divided by numbers of loci to give a mean HpM per locus.

1027

### 1028 **CC-seq: Loci of interest used in this study**

1029 Yeast TSS and TTS coordinates were obtained from the Saccharomyces Genome  
1030 Database <https://www.yeastgenome.org>. These were stratified based on associated gene  
1031 length, expression level in vegetative SK1 (GSM907178, GSM907179, GSM907180), or  
1032 expression level in meiotic SK1 (GSM907176, GSM907177; (Dominissini et al., 2012)).  
1033 Human TSS and TTS coordinates were obtained from the UCSC hg19 knownGene  
1034 annotation, and stratified based on associated gene length, or expression level  
1035 (GSM1395252, GSM1395253, GSM1395254; (Ganem et al., 2014)). Occupied RPE-1 CTCF  
1036 motifs were identified as follows: The FIMO tool (Grant et al., 2011) and the CTCF Position  
1037 Weight Matrix (PWM) from the JASPAR database (Mathelier et al., 2014) were used to find  
1038 all significant hg19 CTCF motifs ( $p < 1 \times 10^{-4}$ ). These were filtered to include only those  
1039 which overlapped positions of RPE-1 CTCF ChIP-seq peaks (GSM749673, GSM1022665;  
1040 (ENCODE, 2012)), and stratified based on this ChIP-seq data. RPE-1 loop anchor-  
1041 associated CTCF motifs were identified using the Juicer MotifFinder (Durand et al., 2016)  
1042 with the RPE-1 WT Hi-C looplist (GSE71831 (Darrow et al., 2016)) and CTCF ChIP-seq BED  
1043 file (GSM749673, GSM1022665; (ENCODE, 2012)) as input. Human TOP2 CC-seq peak  
1044 coordinates were identified by thresholding (0.05 HpM) of pooled +VP16 data presented.

1045

### 1046 **CC-seq: Spatial correlation of yeast Top2 and Spo11 signals**

1047 Nucleotide resolution Top2/Spo11 CC-seq data was binned at 50 bp resolution and the  
1048 Pearson correlation was calculated between the sum HpM for all bins at a given inter-bin  
1049 distance.

1050

1051

1052

1053 **CC-seq: Quantifying single and double-strand Top2 CCs**

1054 Nucleotide resolution Human and Yeast Top2 CC-seq data were first thresholded at 0.05  
1055 and 1 HpM, respectively. SSB sites were defined as those sites without a cognate on the  
1056 opposite strand at the expected offset of 3 bp. DSBs were defined as cognate sites with a  
1057 3 bp offset. SSB and DSB percentages are expressed as a percentage of the total number  
1058 of sites (SSB + DSB). A randomisation experiment was conducted in order to estimate  
1059 expected numbers of SSBs and DSBs within the sample under a random model where  
1060 signal is distributed independently on each strand. To achieve this, the amplitudes of Top2  
1061 CCs (HpM) were shuffled amongst the positions in the nucleotide resolution datasets, prior  
1062 to thresholding and offset analysis as described above.

1063

1064 **CC-seq: DNA sequence composition of single and double-strand Top2 CCs**

1065 Nucleotide resolution Human and Yeast Top2 CC-seq data were first thresholded at 0.05  
1066 and 1 HpM, respectively. The high frequency positions remaining were classified as part of  
1067 a single or double-stranded Top2 CC based on absence or presence of a cognate cleavage  
1068 at the expected W-C offset of 3 bp. For double-stranded Top2 CCs, a dyad axis coordinate  
1069 was defined as the centrepoin between the Top2-linked nucleotides on the W and C strand  
1070 (that is, the midpoint of the central two base pairs in the four base pair overhang). For  
1071 single-stranded Top2 CCs, we used an imaginary dyad axis in the same relative position.  
1072 DNA sequence was aggregated  $\pm 20$  bp around these two classes of Top2 CCs. Statistical  
1073 significance was determined using the one sample (goodness-of-fit) Chi-squared test, as  
1074 described previously (Pommier et al., 1991).

1075

1076 **CC-seq - MethylC Analysis**

1077 A publically-available RPE-1 reduced representation bisulphite sequencing (RRBS) dataset  
1078 (two replicates) was used to define coordinates of nucleotides immediately 3'-relative to  
1079 919,817 unmethylated or 341,136 methylated Cs, based on <10% or >90% methylation.  
1080 Next we aggregated RPE-1 CC-seq (0.01 HpM thresholded) hits on these loci, and divided  
1081 by the number of loci to give a density (barplot). Statistical significance was determined by  
1082 the Kolmogorov-Smirnov test.

1083

1084 **Ideograms**

1085 Human chromosome ideograms were adapted from the open source ideogram package  
1086 (<https://eweitz.github.io/ideogram/>).

1087

## 1088 **Supplementary Figure Legends**

1089

1090 **Figure S1. CC-seq maps covalent Spo11-linked DNA breaks in *S. cerevisiae* meiosis with**  
1091 **nucleotide accuracy (related to Figure 1)**

1092 **A)** Correlation of hotspot signals from CC-seq and oligo-seq.

1093 **B)** Correlation of 500 bp binned Spo11 maps from two representative replicates.

1094 **C)** Correlation of Spo11 cleavages on Watson and Crick strand when offset by 1 bp (boxed), relative  
1095 to other offsets from -4 to +4 bp.

1096 **D)** Spo11 breaks mapped by CC-seq (raw=black, or smoothed=red) anticorrelate with nucleosome  
1097 occupancy measured by MNase-seq (blue).

1098 **E)** Aggregation of Spo11 activity in a 10 Kbp window centred on orientated TSSs in *S. cerevisiae*.  
1099 Three example TSSs are shown orientated in the 5'-3' direction (top). A heatmap of all TSSs in the *S.*  
1100 *cerevisiae* genome, with 25 rows stratified by gene expression level in SK1 cells (middle). The colour  
1101 scale indicates average Spo11 break density. Motifs are also stratified into 4 quartiles of gene  
1102 expression in meiotic SK1 cells, and the average distribution of Spo11 activity in each quartile  
1103 plotted (bottom).

1104

1105 **Figure S2. CC-seq maps covalent Top2-linked DNA breaks in *S. cerevisiae* cycling cells with**  
1106 **nucleotide accuracy (related to Figure 2).**

1107 **A-C)** Correlation of 1 Kbp binned Top2 CC maps from *pdr1* $\Delta$  (A), *pdr1* $\Delta$ *sae2* $\Delta$  (B) and *pdr1* $\Delta$ *mre11* $\Delta$   
1108 (C) cells treated with VP16.

1109 **D)** Pairwise Pearson correlation values for 100 bp binned Top2 CC maps from all assayed  
1110 conditions. Each condition is a pool of two biological replicates.

1111 **E)** Nucleotide-resolution *S. cerevisiae* Top2 CC map of chromosome 3 for all assayed conditions.  
1112 Each condition is a pool of two biological replicates.

1113 **F-H)** The normalised number of Top2 CCs retained in the *pdr1* $\Delta$  (F), *pdr1* $\Delta$ *sae2* $\Delta$  (G) and  
1114 *pdr1* $\Delta$ *mre11* $\Delta$  (H) cells treated  $\pm$ VP16, after filtering to include only sites offset by the given number  
1115 of base pairs. All data were normalised over a -100 to +100 bp window.

1116 **I-K)** Pearson correlation ( $r$ ) of Top2 CC-seq signal on Watson and Crick strands, offset by the  
1117 indicated distance in *pdr1* $\Delta$  (I), *pdr1* $\Delta$ *sae2* $\Delta$  (J) and *pdr1* $\Delta$ *mre11* $\Delta$  (K) cells treated  $\pm$ VP16.

1118

1119 **Figure S3. Top2-linked DNA breaks in *S. cerevisiae* are not correlated with gene expression,**  
1120 **anticorrelate with nucleosomes, and have biased nucleotide skews indicative of bent DNA**  
1121 **(related to Figure 2)**

1122 **A)** Top2 CC mapped by CC-seq (raw=black, or smoothed=red) anticorrelate with nucleosome  
1123 occupancy measured by MNase-seq (blue).

1124 **B)** Aggregation of Top2 CCs in a 10 Kbp window centred on orientated transcription start sites (TSS)  
1125 in *pdr1* $\Delta$  *S. cerevisiae*. Four example TSSs are shown orientated in the 5'-3' direction (top). Heatmap

1126 of all TSSs in the *S. cerevisiae* genome, with 25 rows stratified by gene expression level in vegetative  
1127 growth (middle). Colour scale indicates average Top2 CC density. Motifs are also stratified into four  
1128 quartiles of gene expression, and the average distribution of Top2 CCs in each quartile plotted for  
1129 untreated and +VP16 conditions (bottom).

1130 **C)** The percentage of strong sites that are SSBs and DSBs in etoposide-treated *pdr1Δ*, *pdr1Δsae2Δ*  
1131 and *pdr1Δmre11Δ* *S. cerevisiae*. Sites were thresholded at 1 HpM prior to sorting into DSB or SSB  
1132 classes based on presence or absence of a 3 bp offset cognate (Obs.). As a control, the amplitudes  
1133 of Top2 CCs (HpM) were randomised amongst the positions in the nucleotide resolution datasets,  
1134 prior to thresholding and offset analysis as described above (Rand.)

1135 **D)** Average nucleotide composition over a 200 bp window centred on the DSB dyad axis, in  
1136 etoposide-treated *pdr1Δ* *S. cerevisiae*. The position of the flanking regions (F.R.) identified in Gyrase  
1137 mapping experiments, and the flanking regions observed here for Top2 are indicated in blue and  
1138 black, respectively.

1139 **E)** Average nucleotide composition over a 120 bp window centred on the DSB dyad axis, in  
1140 etoposide-treated *pdr1Δ* *S. cerevisiae*. The signal pattern is separated into A+T and G+C (top left  
1141 and right), and into individual A, T, C and G plots (middle left, bottom left, middle right, and bottom  
1142 right, respectively). The position of the flanking regions (F.R.) observed here for Top2 are indicated in  
1143 black, and their ~10.5 bp periodicity is highlighted with black and red crosses.

1144

1145 **Figure S4. CC-seq maps of TOP2-linked DNA breaks in Human cells are enriched by**  
1146 **etoposide, and show high reproducibility and nucleotide accuracy (related to Figure 3)**

1147 **A)** Broad-scale *H. sapiens* TOP2 CC-seq maps in individual biological replicates of RPE-1 cells  
1148 ±VP16. Raw data were binned at 100 Kbp prior to plotting. Each plot is offset on the y-axis by +0.3  
1149 HpB.

1150 **B)** Replicate-to-replicate Pearson correlation values (*r*) for 10 Kbp binned TOP2 CC-seq maps of  
1151 RPE-1 cells ±VP16.

1152 **C)** Scatter plot of -VP16 and +VP16 TOP2 CC-seq maps binned at 10 Kbp resolution. Data were first  
1153 scaled according to the estimated noise fraction (**Methods**), and are presented in a hexagonal-  
1154 binned format, where the density of overplotting is indicated by the colour scale.

1155 **D)** Violin plots of TOP2 CC-seq maps ±VP16 binned at 100 Kbp resolution. The inner black bar,  
1156 black dot, and dotted horizontal line indicate the interquartile range, median, and expected mean  
1157 Top2 CC density based on random distribution.

1158 **E)** The normalised number of TOP2 CCs retained in the CC-seq maps in RPE-1 cells ±VP16 after  
1159 filtering to include only sites offset by the given number of base pairs. Data were normalised over a -  
1160 100 to +100 bp window.

1161

1162

1163

1164 **Figure S5. CC-seq signal is TOP2-dependent**

1165 **A)** DNA content histograms of wild type (WT) and *TOP2B*<sup>-/-</sup> RPE-1 cells under asynchronous (10%  
1166 FCS) and serum-deprived (0% FCS) conditions, as measured by FACS following propidium iodide  
1167 (PI) staining. G1, S and G2 populations are clearly present under asynchronous growing conditions.  
1168 A strong G1 arrest is observed in serum deprived conditions. Percentages of cells in each of the  
1169 indicated regions (red dotted brackets) are given.

1170 **B)** Western blots demonstrating the absence of TOP2 $\beta$  protein in serum deprived and asynchronous  
1171 *TOP2B*<sup>-/-</sup> RPE-1 cells (left), and the absence of TOP2 $\alpha$  in serum deprived wild type and *TOP2B*<sup>-/-</sup>  
1172 RPE-1 cells (right). Ponceau S total protein loading is presented (Pon. S) for the left and right panels,  
1173 and additionally a Ku80 loading control is included for the right panel.

1174 **C)** Immunofluorescence experiment demonstrating induction of  $\gamma$ -H2AX foci (green) in asynchronous  
1175 (Async.) and serum-deprived (Ser. Dep.) wild type (WT) and *TOP2B*<sup>-/-</sup> RPE-1 cells, all co-stained with  
1176 DAPI (blue). Galleries of nine cells per condition were chosen randomly using Olympus ScanR  
1177 Analysis software.

1178 **D)** Quantification of (C). Numbers of  $\gamma$ -H2AX foci per cell were counted automatically using Olympus  
1179 ScanR Analysis software. The mean  $\pm$ SEM is reported for n= 3 biological replicate experiments.

1180 **E)** Broad-scale *H. sapiens* TOP2 CC-seq maps in asynchronous and serum-deprived wild type (WT)  
1181 and *TOP2B*<sup>-/-</sup> RPE-1 cells -VP16 (orange) and +VP16 (green). Raw hits on Watson and Crick strands  
1182 were summed and smoothed according to local signal density (Fsize=501).

1183

1184 **Figure S6. TOP2 CC-seq signal enrichment around CTCF and TSS sites, compared with END-**  
1185 **seq DSB signal at TSSs**

1186 **A)** Fine-scale TOP2 CC-seq maps of *H. sapiens* CTCF-proximal loci in RPE-1 cells +VP16. Red and  
1187 blue traces indicate TOP2-linked 5' DNA termini on the Watson and Crick strands, respectively. Pale  
1188 shaded areas are the same data smoothed with a sliding 11 bp Hanning window. Red and Blue  
1189 rectangles indicate the positions of CTCF motifs on the Watson and Crick strands respectively. The  
1190 grey line indicates Hanning-smoothed sum of Watson and Crick TOP2 CCs.

1191 **B)** Fine-scale mapping of TOP2 CCs surrounding three complex CTCF loci, processed as in (A).

1192 **C)** Aggregation of TOP2 CCs in a 1 Kbp window centred on the subset of orientated CTCF motifs  
1193 that can be assigned to a chromatin loop anchor in human RPE-1 cells (Darrow et al., 2016). Motifs  
1194 are stratified into 4 quartiles of loop anchor interaction strength, and the average TOP2 CC  
1195 distribution in each quartile plotted.

1196 **D)** Fine-scale aggregation of TOP2 CCs (red) in a 800 bp window centred on TSSs in human RPE-1  
1197 cells, showing anticorrelation with aggregated MNase-seq signal (blue).

1198 **E)** Aggregation of END-seq mapped DSBs in a 10 Kbp window centred on orientated TSSs in human  
1199 MCF7 cells. Four example TSSs are shown orientated in the 5'-3' direction (top). A heatmap of all  
1200 TSSs in the human genome, with 25 rows stratified by flanking gene expression level in MCF7 cells  
1201 (middle). The colour scale indicates average END-seq DSB density. TSSs are also stratified into 4

1202 quartiles based on strength of flanking gene expression, and the average END-seq DSB distribution  
1203 in each quartile plotted (bottom).

1204

1205 **Figure S7. TSS-proximal TOP2-linked DNA breaks in humans are correlated with gene length,**  
1206 **independently from gene expression level (related to Figure 5); TSS-proximal Top2-linked DNA**  
1207 **breaks in yeast are not strongly correlated with gene length, (related to Figure 2)**

1208 **A)** Aggregation of TOP2 CCs in a 10 Kbp window centred on orientated TSSs in human RPE-1 cells.  
1209 A heatmap of all TSSs in the human genome, with 25 rows stratified by gene length (top). The colour  
1210 scale indicates average TOP2 CC density. Motifs are also stratified into 4 quartiles of gene length,  
1211 and the average TOP2 CC distribution in each quartile plotted (bottom).

1212 **B)** Aggregation of Top2 CCs in a 10 Kbp window centred on orientated transcription start sites (TSS)  
1213 in *ptr1Δ S. cerevisiae*. Heatmap of all TSSs in the *S. cerevisiae* genome, with 25 rows stratified by  
1214 gene length level (top). Colour scale indicates average Top2 CC density. Motifs are also stratified  
1215 into four quartiles of gene length, and the average distribution of Top2 CCs in each quartile plotted  
1216 (bottom).

1217 **C)** Scatter plot of human gene length and RPE-1 gene expression, showing no correlation.

1218 **D)** Scatter plot of *S. cerevisiae* gene length and gene expression during vegetative growth, showing  
1219 little correlation.

1220

1221

1222

1223

## 1224 Supplementary Tables

1225

1226

1227 **Table S1. DNA libraries used for mapping Spo11 activity.** The number of reads  
1228 remaining after each stage of the data pipeline are indicated.

1229

| Species              | Strain/ Cell line | Condition | NGS Platform | Library code | Total Read Pairs | Mapped reads | Blacklist-filtered reads | % of Total |
|----------------------|-------------------|-----------|--------------|--------------|------------------|--------------|--------------------------|------------|
| <i>S. cerevisiae</i> | <i>sae2Δ</i>      | Meiosis   | MiSeq        | 1            | 3512089          | 3376630      | 3177210                  | 90.5       |
|                      |                   |           |              | 2A           | 10101423         | 3796998      | 3564017                  | 84.8       |
|                      |                   |           |              | 3            | 4957477          | 4745192      | 4502308                  | 90.8       |
|                      |                   |           |              | 5            | 4012972          | 3705100      | 3559541                  | 88.7       |
|                      |                   |           |              | 7BC          | 4065600          | 3779390      | 3569290                  | 87.8       |

1230

1231

1232

1233



1234  
1235  
1236

**Table S2. DNA libraries used for mapping Top2 activity.** The number of reads remaining after each stage of the data pipeline are indicated.

| Species              | Strain/ Cell line   | Condition   | NGS Platform | Library code | Total Read Pairs | Mapped reads | De-duplicated reads | Blacklist-filtered reads | % of Total | Pooled Reads (Millions) |
|----------------------|---------------------|-------------|--------------|--------------|------------------|--------------|---------------------|--------------------------|------------|-------------------------|
| <i>S. cerevisiae</i> | <i>pdr1Δ</i>        | -VP16       | NextSeq 500  | RA1          | 3741251          | 3542955      | 3179049             | 2746294                  | 73.4       | 3.50                    |
|                      |                     |             |              | RA8          | 1118483          | 879107       | 842290              | 751850                   | 67.2       |                         |
| <i>S. cerevisiae</i> | <i>pdr1Δ</i>        | +VP16       | NextSeq 500  | RA2          | 3096257          | 3053356      | 2679303             | 2234941                  | 72.2       | 3.93                    |
|                      |                     |             |              | RA9          | 2262958          | 2071231      | 1958341             | 1690075                  | 74.7       |                         |
| <i>S. cerevisiae</i> | <i>pdr1Δ sae2Δ</i>  | -VP16       | NextSeq 500  | RA4          | 3634284          | 3552818      | 3215523             | 2745668                  | 75.5       | 3.79                    |
|                      |                     |             |              | RA10         | 1420662          | 1214067      | 1181399             | 1046827                  | 73.7       |                         |
| <i>S. cerevisiae</i> | <i>pdr1Δ sae2Δ</i>  | +VP16       | NextSeq 500  | RA5          | 2529368          | 2476714      | 1386551             | 1097282                  | 43.4       | 3.54                    |
|                      |                     |             |              | RA11         | 3226626          | 3063388      | 2824882             | 2444486                  | 75.8       |                         |
| <i>S. cerevisiae</i> | <i>pdr1Δ mre11Δ</i> | -VP16       | NextSeq 500  | RA6          | 5345587          | 5205411      | 4288662             | 3646842                  | 68.2       | 4.76                    |
|                      |                     |             |              | RA12         | 1519020          | 1326435      | 1280137             | 1109310                  | 73.0       |                         |
| <i>S. cerevisiae</i> | <i>pdr1Δ mre11Δ</i> | +VP16       | NextSeq 500  | RA7          | 3382546          | 3357168      | 2921333             | 2526342                  | 74.7       | 5.54                    |
|                      |                     |             |              | RA13         | 4133347          | 4032996      | 3540366             | 3010542                  | 72.8       |                         |
| Human                | RPE-1 WT            | -VP16       | NextSeq 500  | WG11         | 125203096        | 109503841    | 68845619            | 68639594                 | 54.8       | 185.36                  |
|                      |                     |             |              | WG15         | 125328792        | 110432447    | 46588296            | 46449378                 | 37.1       |                         |
|                      |                     |             |              | WG23         | 89154181         | 77728045     | 70484665            | 70269334                 | 78.8       |                         |
| Human                | RPE-1 WT            | +VP16       | NextSeq 500  | WG12         | 110910655        | 95546007     | 55848200            | 55681939                 | 50.2       | 276.97                  |
|                      |                     |             |              | WG16         | 102804692        | 91872706     | 54312084            | 54164650                 | 52.7       |                         |
|                      |                     |             |              | WG24         | 130816235        | 114086421    | 101162102           | 100857557                | 77.1       |                         |
|                      |                     |             |              | WG34         | 91829516         | 79751337     | 66458538            | 66270349                 | 72.2       |                         |
| Human                | RPE-1 WT            | -VP16 G1    | MiSeq        | WG13         | 2601642          | 2292863      | 2007177             | 1991088                  | 76.5       | 4.27                    |
|                      |                     |             |              | WG21         | 2610523          | 2298289      | 2295625             | 2277124                  | 87.2       |                         |
| Human                | RPE-1 WT            | +VP16 G1    | MiSeq        | WG14         | 3075620          | 2771819      | 2491674             | 2475350                  | 80.5       | 5.23                    |
|                      |                     |             |              | WG22         | 3139164          | 2779809      | 2772349             | 2751281                  | 87.6       |                         |
| Human                | RPE-1 WT            | -VP16 Async | MiSeq        | WG15b*       | 3207507          | 2866283      | 2782876             | 2760652                  | 86.1       | 5.35                    |
|                      |                     |             |              | WG23         | 2959289          | 2616954      | 2608670             | 2586523                  | 87.4       |                         |
| Human                | RPE-1 WT            | +VP16 Async | MiSeq        | WG16b*       | 3018163          | 2721770      | 2673273             | 2656580                  | 88.0       | 6.30                    |
|                      |                     |             |              | WG24         | 4165048          | 3682708      | 3668602             | 3639324                  | 87.4       |                         |
| Human                | RPE-1 TOP2B         | -VP16 G1    | MiSeq        | WG17         | 2978044          | 2624262      | 2558332             | 2536752                  | 85.2       | 4.69                    |
|                      |                     |             |              | WG25         | 2460949          | 2181002      | 2173777             | 2155101                  | 87.6       |                         |
| Human                | RPE-1 TOP2B         | +VP16 G1    | MiSeq        | WG18         | 2927745          | 2588870      | 2557532             | 2537085                  | 86.7       | 5.10                    |
|                      |                     |             |              | WG26         | 2922624          | 2596547      | 2587152             | 2565454                  | 87.8       |                         |
| Human                | RPE-1 TOP2B         | -VP16 Async | MiSeq        | WG19         | 3713068          | 3278164      | 3188049             | 3162895                  | 85.2       | 7.04                    |
|                      |                     |             |              | WG27         | 4413242          | 3943962      | 3910035             | 3877611                  | 87.9       |                         |
| Human                | RPE-1 TOP2B         | +VP16 Async | MiSeq        | WG20         | 3426100          | 3038601      | 2978047             | 2956076                  | 86.3       | 8.13                    |
|                      |                     |             |              | WG28         | 5878342          | 5251089      | 5211027             | 5169010                  | 87.9       |                         |

1237  
1238  
1239

1240 **Table S3. *S. cerevisiae* strains used in this study.** Strains MJ315 and M319 were  
 1241 used for Spo11 mapping; strains MJ429, MJ475 and MJ551 were used for Top2  
 1242 mapping.  
 1243

| Strain                   | Number | Genotype                                                                                                                                                                                              |
|--------------------------|--------|-------------------------------------------------------------------------------------------------------------------------------------------------------------------------------------------------------|
| <i>sae2Δ</i>             | MJ315  | SK1: <i>ho::LYS2'</i> , <i>lys2'</i> , <i>ura3'</i> , <i>arg4-nsp'</i> , <i>leu2::hisG'</i> , <i>his4X::LEU2'</i> , <i>nuc1::LEU2'</i> , <i>sae2Δ::KanMX6'</i>                                        |
| <i>sae2Δ spo11-Y135F</i> | MJ319  | SK1: <i>ho::LYS2'</i> , <i>lys2'</i> , <i>ura3'</i> , <i>arg4-nsp'</i> , <i>leu2::hisG'</i> , <i>his4X::LEU2'</i> , <i>nuc1::LEU2'</i> , <i>spo11(Y135F)-HA3His6::KanMX4'</i> , <i>sae2Δ::KanMX6'</i> |
| <i>pdr1Δ</i>             | MJ429  | BY4741: <i>ura3Δ0</i> , <i>leu2Δ0</i> , <i>his3Δ1</i> , <i>met15Δ0</i> , <i>pdr1Δ::PDR1-DBD-CYC8::LEU2</i>                                                                                            |
| <i>pdr1Δ sae2Δ</i>       | MJ475  | BY4741: <i>ura3Δ0</i> , <i>leu2Δ0</i> , <i>his3Δ1</i> , <i>met15Δ0</i> , <i>pdr1Δ::PDR1-DBD-CYC8::LEU2</i> , <i>sae2Δ::KanMX6</i>                                                                     |
| <i>pdr1Δ mre11Δ</i>      | MJ551  | BY4741: <i>ura3Δ0</i> , <i>leu2Δ0</i> , <i>his3Δ1</i> , <i>met15Δ0</i> , <i>pdr1Δ::PDR1-DBD-CYC8::LEU2</i> , <i>mre11Δ::KanMX4</i>                                                                    |

1244  
 1245  
 1246

1247 **Table S4. Human cell lines used in this study.**  
 1248

| Parent cell line | Clone number | Genotype     |
|------------------|--------------|--------------|
| hTERT RPE-1      | WT           | WT           |
| hTERT RPE-1      | T2B/1        | <i>TOP2B</i> |

1249  
 1250  
 1251

1252 **Table S5. The annealed structures of the custom P5 and P7 adapters.** “T<sub>i</sub>” indicates  
 1253 an inverted dT, linked via a 3'-3' phosphodiester. This inhibits unwanted ligation at this  
 1254 end of the adapter. Also note that the 5'-terminal moieties of each adapter (A for P5, G  
 1255 for P7) are nucleosides (3'-OH), which further inhibits ligation at this end  
 1256

| Adapter | Annealed Structure                                                                                                                         |
|---------|--------------------------------------------------------------------------------------------------------------------------------------------|
| P5      | <b>blocked</b> ACACTCTTTCCCTACACGACGCTCTTCCGATCT <b>ligated</b><br><b>end</b> T <sub>i</sub> TGTGAGAAAGGGATGTGCTGCGAGAAGGCTAGp <b>end</b>  |
| P7      | <b>ligated</b> pGATCGGAAGAGCACACGTCTGAACTCCAGTCACT <sub>i</sub> <b>blocked</b><br><b>end</b> TCTAGCCTTCTCGTGTGCAGACTTGAGGTCAGTG <b>end</b> |

1257  
 1258  
 1259  
 1260

**Table S6. Publically available datasets used in this study.**

| Species/ Cell line                      | Dataset Type               | Accession(s)                                                                | Reference                  |
|-----------------------------------------|----------------------------|-----------------------------------------------------------------------------|----------------------------|
| <i>S. cerevisiae</i> / SK1 (meiotic)    | Gene expression microarray | GSM907178, GSM90719, GSM907180                                              | (Dominissini et al., 2012) |
| <i>S. cerevisiae</i> / SK1 (vegetative) | Gene expression microarray | GSM907176, GSM907177                                                        | (Dominissini et al., 2012) |
| <i>H. sapiens</i> / RPE-1               | Gene expression microarray | GSM1395252, GSM1395253, GSM1395254                                          | (Ganem et al., 2014)       |
| <i>H. Sapiens</i> / MCF7                | Gene expression microarray | GSM1141244                                                                  | (Nelson et al., 2013)      |
| <i>H. sapiens</i> / RPE-1               | Hi-C                       | GSE71831                                                                    | (Darrow et al., 2016)      |
| <i>H. sapiens</i> / RPE-1               | bTMP-seq                   | GSM1062645, GSM1062646                                                      | (Naughton et al., 2013)    |
| <i>H. sapiens</i> / MCF7                | END-seq                    | GSM2635568                                                                  | (Canela et al., 2017)      |
| <i>H. sapiens</i> / RPE-1               | CTCF ChIP-seq              | GSM749673, GSM1022665                                                       | (ENCODE, 2012)             |
| <i>H. sapiens</i> / RPE-1               | H3K4Me3 ChIP-seq           | GSM945271, GSM945271                                                        | (ENCODE, 2012)             |
| <i>H. sapiens</i> / RPE-1               | H3K27Ac ChIP-seq           | GSM733771, GSM733718, GSM733755, GSM733691, GSM733656, GSM733674, GSM733646 | (ENCODE, 2012)             |
| <i>H. sapiens</i> / RPE-1               | Methyl-RRBS                | GSM683773, GSM683905                                                        | (ENCODE, 2012)             |
| <i>H. sapiens</i> / K562                | MNase-seq                  | GSM920557                                                                   | (ENCODE, 2012)             |

## 1261 **Supplementary methods references**

1262

1263 Canela, A., Maman, Y., Jung, S., Wong, N., Callen, E., Day, A., Kieffer-Kwon, K.-R., Pekowska, A.,  
1264 Zhang, H., Rao, S. S. P., Huang, S.-C., Mckinnon, P. J., Aplan, P. D., Pommier, Y., Aiden, E. L.,  
1265 Casellas, R., and Nussenzweig, A. (2017). Genome Organization Drives Chromosome Fragility. *Cell*  
1266 *170*, 507-521.e18.

1267 Darrow, E. M., Huntley, M. H., Dudchenko, O., Stamenova, E. K., Durand, N. C., Sun, Z., Huang, S.  
1268 C., Sanborn, A. L., Machol, I., Shamim, M., Seberg, A. P., Lander, E. S., Chadwick, B. P., and Aiden,  
1269 E. L. (2016). Deletion of DXZ4 on the human inactive X chromosome alters higher-order genome  
1270 architecture. *Proc Natl Acad Sci U S A* *113*, E4504-12.

1271 Dominissini, D., Moshitch-Moshkovitz, S., Schwartz, S., Salmon-Divon, M., Ungar, L., Osenberg, S.,  
1272 Cesarkas, K., Jacob-Hirsch, J., Amariglio, N., Kupiec, M., Sorek, R., and Rechavi, G. (2012).  
1273 Topology of the human and mouse m6A RNA methylomes revealed by m6A-seq. *Nature* *485*, 201-  
1274 206.

1275 Durand, N. C., Shamim, M. S., Machol, I., Rao, S. S., Huntley, M. H., Lander, E. S., and Aiden, E. L.  
1276 (2016). Juicer Provides a One-Click System for Analyzing Loop-Resolution Hi-C Experiments. *Cell*  
1277 *Syst* *3*, 95-98.

1278 ENCODE, P. C. (2012). An integrated encyclopedia of DNA elements in the human genome. *Nature*  
1279 *489*, 57-74.

1280 Ganem, N. J., Cornils, H., Chiu, S. Y., O'Rourke, K. P., Arnaud, J., Yimlamai, D., Théry, M., Camargo,  
1281 F. D., and Pellman, D. (2014). Cytokinesis failure triggers hippo tumor suppressor pathway activation.  
1282 *Cell* *158*, 833-848.

1283 Grant, C. E., Bailey, T. L., and Noble, W. S. (2011). FIMO: scanning for occurrences of a given motif.  
1284 *Bioinformatics* *27*, 1017-1018.

1285 Grzybowski, A. T., Chen, Z., and Ruthenburg, A. J. (2015). Calibrating ChIP-Seq with Nucleosomal  
1286 Internal Standards to Measure Histone Modification Density Genome Wide. *Mol Cell* *58*, 886-899.

1287 Hoffman, M. M., Ernst, J., Wilder, S. P., Kundaje, A., Harris, R. S., Libbrecht, M., Giardine, B.,  
1288 Ellenbogen, P. M., Bilmes, J. A., Birney, E., Hardison, R. C., Dunham, I., Kellis, M., and Noble, W. S.  
1289 (2013). Integrative annotation of chromatin elements from ENCODE data. *Nucleic Acids Res* *41*, 827-  
1290 841.

1291 Hornyak, P., Askwith, T., Walker, S., Komulainen, E., Paradowski, M., Pennicott, L. E., Bartlett, E. J.,  
1292 Brissett, N. C., Raoof, A., Watson, M., Jordan, A. M., Ogilvie, D. J., Ward, S. E., Atack, J. R., Pearl, L.  
1293 H., Caldecott, K. W., and Oliver, A. W. (2016). Mode of action of DNA-competitive small molecule  
1294 inhibitors of tyrosyl DNA phosphodiesterase 2. *Biochem J* *473*, 1869-1879.

1295 Hsu, P. D., Scott, D. A., Weinstein, J. A., Ran, F. A., Konermann, S., Agarwala, V., Li, Y., Fine, E. J.,  
1296 Wu, X., Shalem, O., Cradick, T. J., Marraffini, L. A., Bao, G., and Zhang, F. (2013). DNA targeting  
1297 specificity of RNA-guided Cas9 nucleases. *Nat Biotechnol* *31*, 827-832.

1298 Hu, B., Petela, N., Kurze, A., Chan, K.-L., Chopard, C., and Nasmyth, K. (2015). Biological  
1299 chromodynamics: a general method for measuring protein occupancy across the genome by  
1300 calibrating ChIP-seq. *Nucleic Acids Res*

1301 Johnson, D., Allison, R. M., Cannavo, E., Cejka, P., and Neale, M. (2019). Removal of Spo11 from  
1302 meiotic DNA breaks in vitro but not in vivo by Tyrosyl DNA Phosphodiesterase 2. *bioRxiv*  
1303 <http://dx.doi.org/10.1101/527333>,

1304 Liang, K., and Keleş, S. (2012). Normalization of ChIP-seq data with control. *BMC Bioinformatics* *13*,  
1305 199.

1306 Lieberman-Aiden, E., van Berkum, N. L., Williams, L., Imakaev, M., Ragoczy, T., Telling, A., Amit, I.,  
1307 Lajoie, B. R., Sabo, P. J., Dorschner, M. O., Sandstrom, R., Bernstein, B., Bender, M. A., Groudine,  
1308 M., Gnirke, A., Stamatoyannopoulos, J., Mirny, L. A., Lander, E. S., and Dekker, J. (2009).  
1309 Comprehensive mapping of long-range interactions reveals folding principles of the human genome.  
1310 *Science* *326*, 289-293.

1311 Mathelier, A., Zhao, X., Zhang, A. W., Parcy, F., Worsley-Hunt, R., Arenillas, D. J., Buchman, S.,  
1312 Chen, C. Y., Chou, A., Ienasescu, H., Lim, J., Shyr, C., Tan, G., Zhou, M., Lenhard, B., Sandelin, A.,

1313 and Wasserman, W. W. (2014). JASPAR 2014: an extensively expanded and updated open-access  
1314 database of transcription factor binding profiles. *Nucleic Acids Res* 42, D142-7.  
1315 Naughton, C., Avlonitis, N., Corless, S., Prendergast, J. G., Mati, I. K., Eijk, P. P., Cockroft, S. L.,  
1316 Bradley, M., Ylstra, B., and Gilbert, N. (2013). Transcription forms and remodels supercoiling domains  
1317 unfolding large-scale chromatin structures. *Nat Struct Mol Biol* 20, 387-395.  
1318 Nelson, E. R., Wardell, S. E., Jasper, J. S., Park, S., Suchindran, S., Howe, M. K., Carver, N. J., Pillai,  
1319 R. V., Sullivan, P. M., Sondhi, V., Umetani, M., Geradts, J., and McDonnell, D. P. (2013). 27-  
1320 Hydroxycholesterol links hypercholesterolemia and breast cancer pathophysiology. *Science* 342,  
1321 1094-1098.  
1322 Pan, J., Sasaki, M., Kniewel, R., Murakami, H., Blitzblau, H. G., Tischfield, S. E., Zhu, X., Neale, M.  
1323 J., Jasin, M., Socci, N. D., Hochwagen, A., and Keeney, S. (2011). A Hierarchical Combination of  
1324 Factors Shapes the Genome-wide Topography of Yeast Meiotic Recombination Initiation. *Cell* 144,  
1325 719-731.  
1326 Pommier, Y., Capranico, G., Orr, A., and Kohn, K. W. (1991). Local base sequence preferences for  
1327 DNA cleavage by mammalian topoisomerase II in the presence of amsacrine or teniposide. *Nucleic*  
1328 *Acids Res* 19, 5973-5980.  
1329 Stepanov, A., Nitiss, K. C., Neale, G., and Nitiss, J. L. (2008). Enhancing drug accumulation in  
1330 *Saccharomyces cerevisiae* by repression of pleiotropic drug resistance genes with chimeric  
1331 transcription repressors. *Mol Pharmacol* 74, 423-431.  
1332  
1333

Figure 1

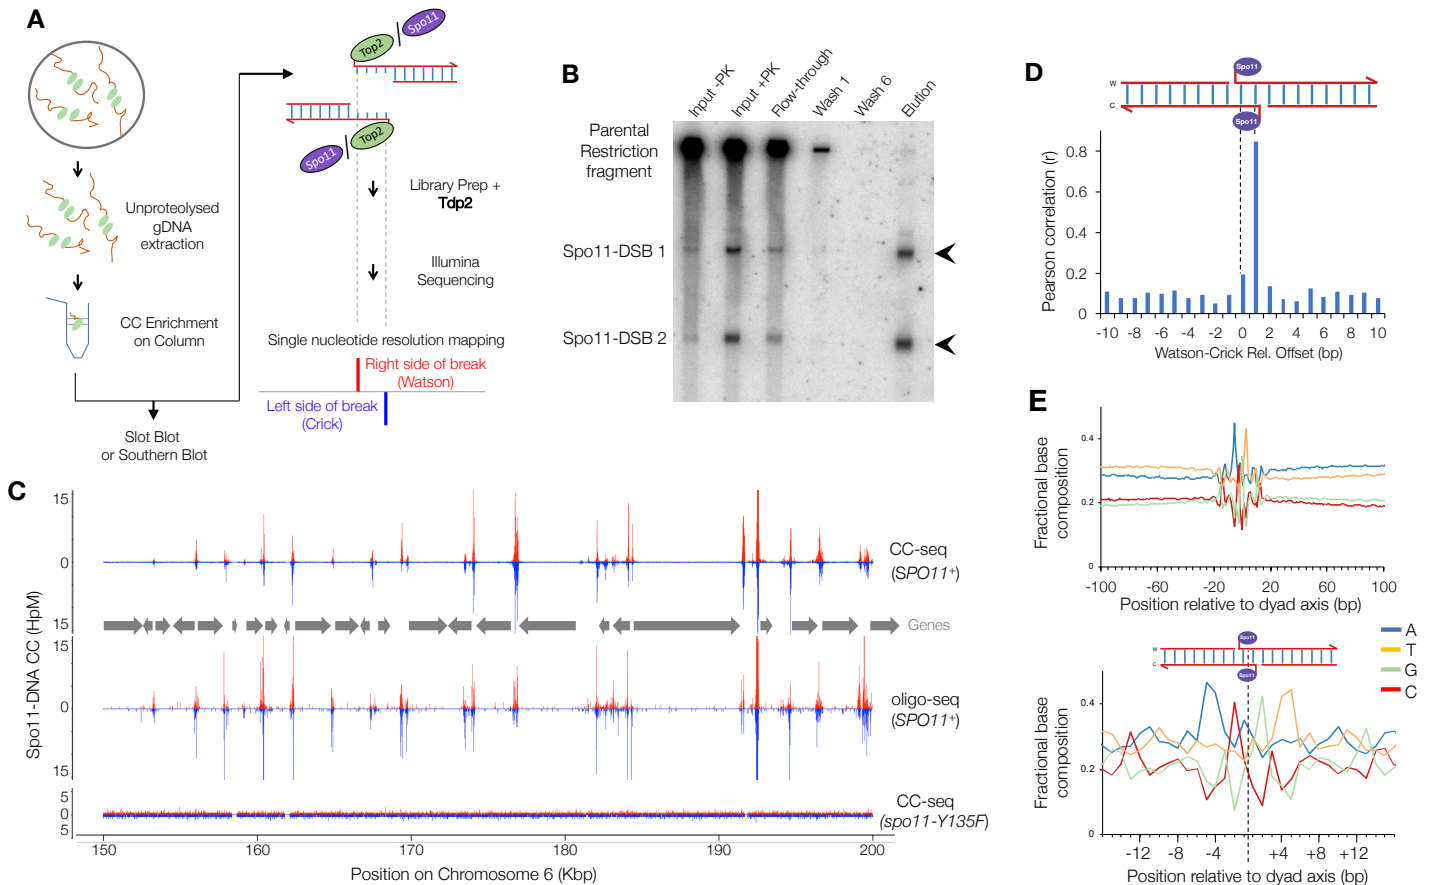

**Figure 1. CC-seq maps covalent Spo11-linked DNA breaks in *S. cerevisiae* meiosis with nucleotide accuracy**

**A)** Schematic of the CC-seq method.

**B)** Column-based enrichment of Spo11-linked DNA fragments detected by Southern blotting at the *his4::LEU2* recombination hotspot (**Methods**). Arrows indicate expected sizes of Spo11-DSBs.

**C)** Nucleotide resolution mapping of *S. cerevisiae* Spo11 hotspots by CC-seq or oligo-seq (Pan et al., 2011). Red and blue traces indicate Spo11-linked 5' DNA termini on the Watson and Crick strands, respectively. Grey arrows indicate positions of gene open reading frames.

**D)** Pearson correlation ( $r$ ) of Spo11 CC-seq signal between Watson and Crick strands, offset by the indicated distances.

**E)** Average nucleotide composition over a 200 (top) and 30 bp (bottom) window centred on Spo11 breaks. Bases reported are for the top strand only.

HpM = Hits per million mapped reads per base pair.

Figure 2

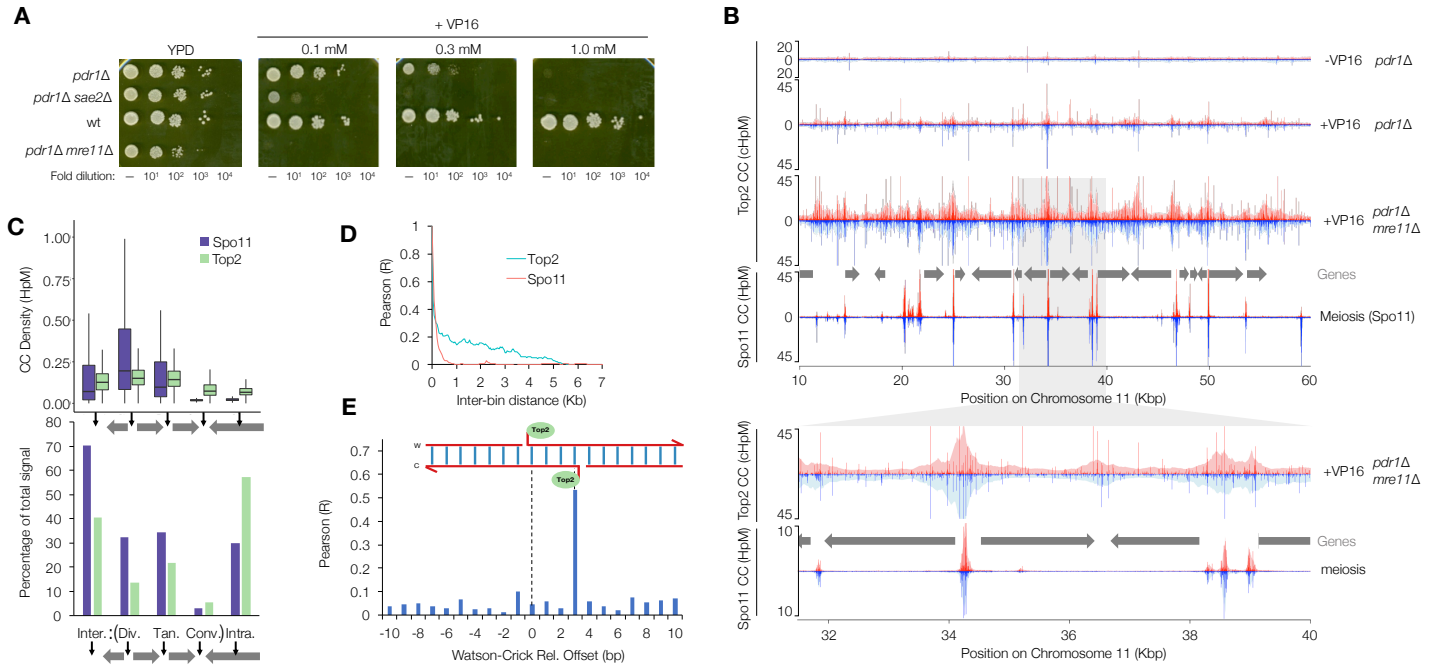

**Figure 2. CC-seq maps covalent Top2-linked DNA breaks in *S. cerevisiae* cycling cells with nucleotide accuracy**

**A)** Serial dilution spot tests of VP16 tolerance for the indicated strains.

**B)** Nucleotide resolution mapping of *S. cerevisiae* Top2 CCs by CC-seq of the indicated strains after treatment for 4 hours with 1 mM VP16. Spo11-CC data is plotted for comparison. Top2 CC data were calibrated using a human DNA spike-in (**Methods**). Red and blue traces indicate CC-linked 5' DNA termini on the Watson and Crick strands, respectively. Grey arrows indicate positions of gene open reading frames. Lower panels show an expanded view of the region from 31.5 to 40 Kbp.

**C)** Quantification of Top2 and Spo11 CC signal stratified by genomic region. The genome was divided into intra and intergenic regions; the intergenic region was further divided into divergent, tandem and convergent based on orientation of flanking genes. Spo11 and Top2 activity mapped by CC-seq is expressed as box-and-whisker plots of density (upper and lower box limit: 3<sup>rd</sup> and 1<sup>st</sup> quartile; bar: median; upper and lower whisker: highest and lowest values within 1.5-fold of the interquartile range), or as the percentage of total mapped reads.

**D)** Local correlation of Top2 or Spo11 CC-seq signals. Top2 or Spo11 CC-seq data were binned at 50 bp resolution and the Pearson correlation calculated between bins of increasing separation.

**E)** Pearson correlation ( $r$ ) of Top2 CC-seq signal on Watson and Crick strands, offset by the indicated distance.

HpM = Hits per million mapped reads per base pair.



Figure 3

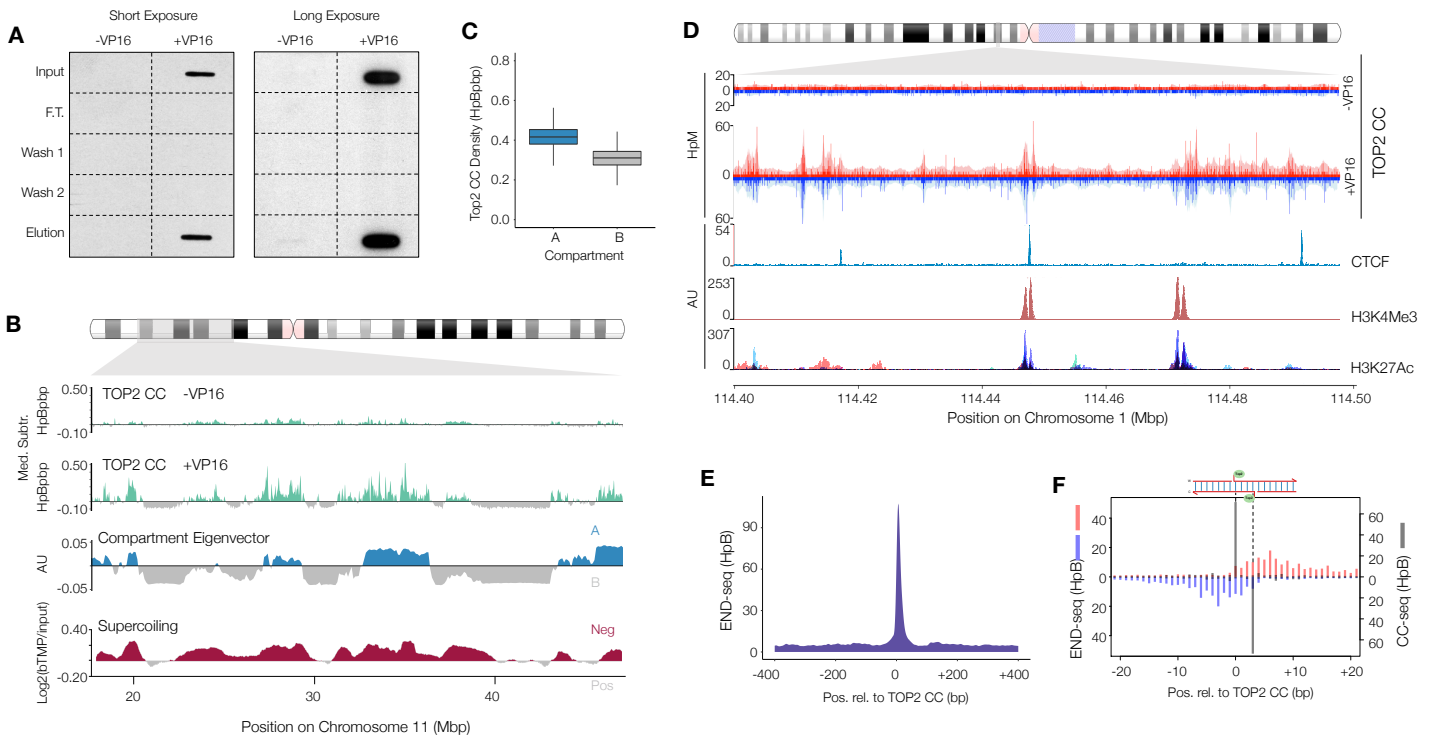

**Figure 3. CC-seq maps TOP2-linked DNA breaks in Human cells with nucleotide accuracy**

**A)** Anti-TOP2 $\beta$  western slot blot of input, flow through, wash, and elution fractions. RPE-1 cells were treated or not with VP16, prior to processing according to **Figure 1A**.

**B)** Broad-scale maps of *H. sapiens* TOP2 CCs produced by CC-seq in RPE-1 cells  $\pm$ VP16. Raw data were scaled, binned, smoothed and median subtracted prior to plotting (**Methods**). Chromatin compartments revealed by Hi-C eigenvector analysis (Darrow et al., 2016), and supercoiling revealed by bTMP ChIP-seq (Naughton et al., 2013) are shown for comparison.

**C)** Quantification of TOP2 CC in chromatin compartments A and B. Data are expressed as box-and-whisker plots of density as for **Figure 2C**.

**D)** Fine-scale mapping of *H. sapiens* TOP2 CCs by CC-seq in RPE-1 cells  $\pm$ VP16. Red and blue traces indicate TOP2-linked 5' DNA termini on the Watson and Crick strands, respectively. Pale shaded areas are the same data smoothed according to local density (see **Methods**). RPE-1 CTCF and H3K4Me3 ChIP-seq data plus H3K27Ac ChIP-seq data overlaid from seven cell lines (ENCODE, 2012) is shown for comparison.

**E)** Medium-scale aggregate of END-seq mapped DSBs (Canela et al., 2017) surrounding nucleotide resolution CC-seq mapped TOP2 CCs.

**F)** Fine-scale strand-specific aggregate of END-seq mapped DSB ends (red and blue bars) and nucleotide resolution CC-seq mapped TOP2 CCs (grey bars) surrounding strong TOP2 CC sites.

Figure 4

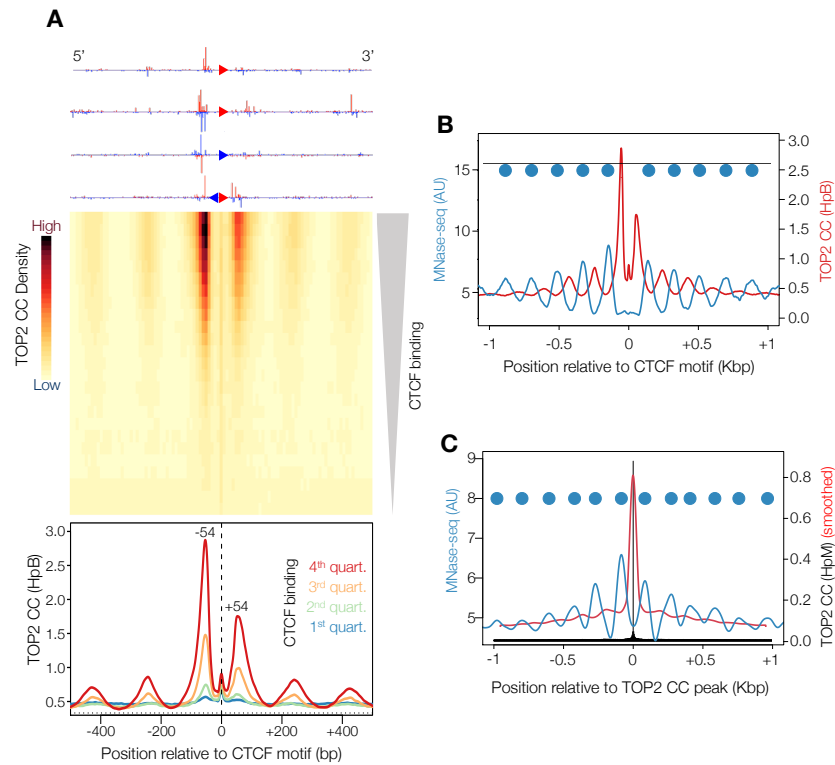

**Figure 4. CTCF-proximal TOP2 activity is tightly confined within nucleosome-depleted regions**

**A)** Aggregation of TOP2 CCs in a 1 Kbp window centred on orientated CTCF motifs in human RPE-1 cells. Four example CTCF loci are shown orientated in the 5'-3' direction (top). A heatmap of all CTCF-motifs in the human genome, with 25 rows stratified by the strength of colocalising CTCF ChIP-seq peaks in RPE-1 cells (middle). The colour scale indicates average TOP2 CC density. Motifs are also stratified into 4 quartiles of CTCF-binding, and the average TOP2 CC distribution in each quartile plotted (bottom).

**B)** Aggregated TOP2 CC distribution (red line) in the highest quartile of CTCF-binding compared with the average MNase-seq signal (blue line).

**C)** Aggregated TOP2 CC distribution (black and red lines: single-nucleotide resolution and smoothed, respectively) and the average MNase-seq signal (blue line) surrounding strong TOP2 CC sites.

In (B) and (C) peaks in MNase-seq signal indicate inferred nucleosome positions (blue circles).

Figure 5

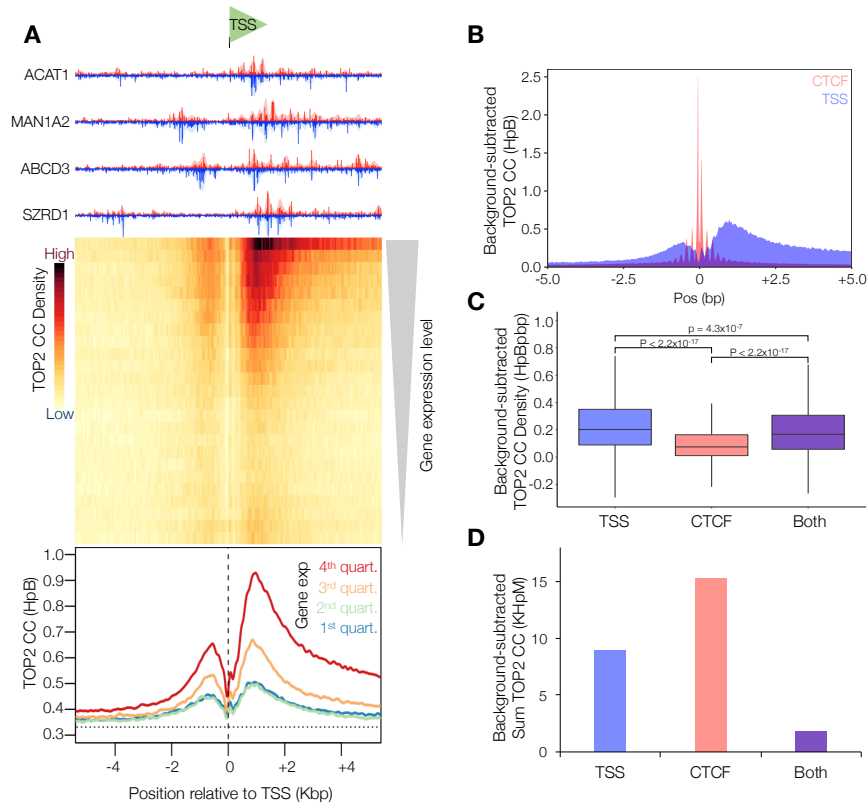

**Figure 5. TSS-proximal TOP2 activity is strongly correlated with gene transcription**

**A)** Aggregation of TOP2 CCs in a 10 Kbp window centred on orientated TSSs in human RPE-1 cells. Four example TSSs are shown orientated in the 5'-3' direction (top). A heatmap of all TSSs in the human genome, with 25 rows stratified by gene expression level in RPE-1 cells (middle). The colour scale indicates average TOP2 CC density. Motifs are also stratified into 4 quartiles of gene expression, and the average TOP2 CC distribution in each quartile plotted (bottom).

**B)** Comparison of CTCF-proximal and TSS-proximal TOP2 CC distributions in the highest quartile of CTCF-binding (pink) and gene-expression (blue), respectively.

**C)** Average TOP2 CC density in 10 Kbp regions centred on the highest quartile of TSS, CTCF, or regions where both features are present. Data are expressed as box-and-whisker plots of density as in **Figure 2C**. Statistical significance was determined using the KS test.

**D)** As in (C) but sum total TOP2 CCs found in these regions.

Figure 6

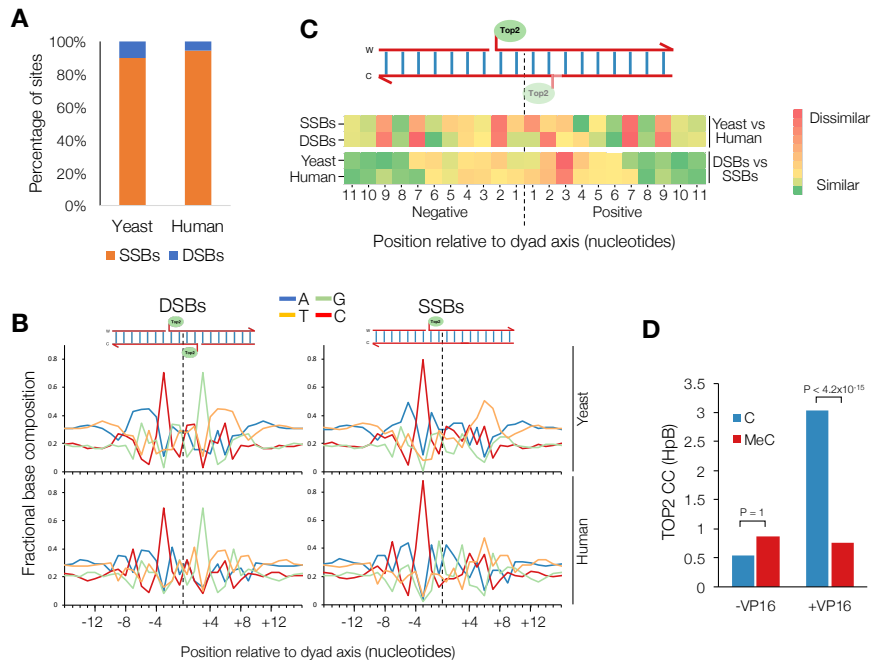

**Figure 6. Local DNA sequence and methylation status direct the formation of Top2 CCs**

**A)** The percentage of strong sites that are SSBs and DSBs in etoposide-treated *S. cerevisiae* and human cells.

**B)** Average nucleotide composition over a 30 bp window centred on the DSB or (inferred) SSB dyad axis, in etoposide-treated *S. cerevisiae* and human cells. Values reported are for the top strand only.

**C)** Heatmaps describing pairwise similarity of nucleotide composition patterns shown in (B). Rows 1-4 are the absolute differences between: yeast and human SSB patterns, yeast and human DSB patterns, yeast SSB and DSB patterns, and human SSB and DSB patterns, respectively.

**D)** The average number of TOP2 CCs at the +1 position relative to methylated and unmethylated cytosines in human RPE-1 cells,  $\pm$ VP16. Statistical significance was determined using KS test.

Figure S1

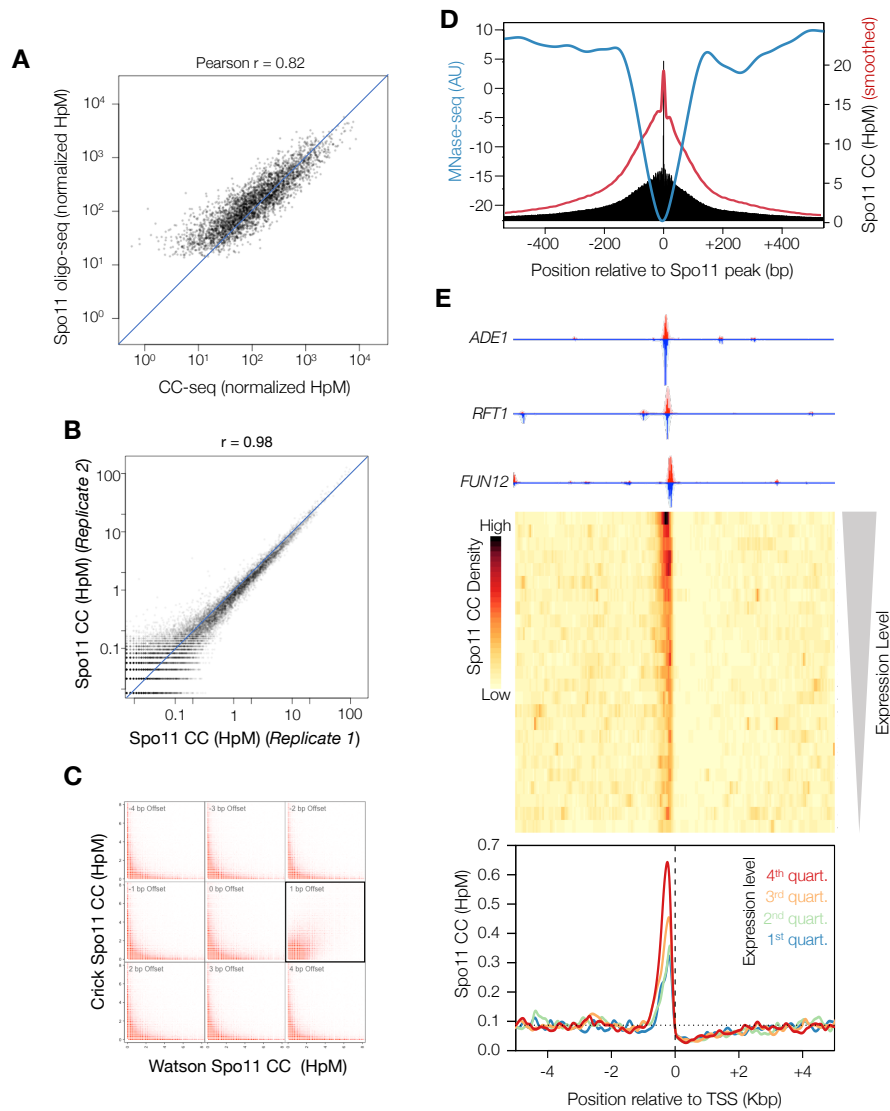

**Figure S1. CC-seq maps covalent Spo11-linked DNA breaks in *S. cerevisiae* meiosis with nucleotide accuracy (related to Figure 1)**

**A)** Correlation of hotspot signals from CC-seq and oligo-seq.

**B)** Correlation of 500 bp binned Spo11 maps from two representative replicates.

**C)** Correlation of Spo11 cleavages on Watson and Crick strand when offset by 1 bp (boxed), relative to other offsets from -4 to +4 bp.

**D)** Spo11 breaks mapped by CC-seq (raw=black, or smoothed=red) anticorrelate with nucleosome occupancy measured by MNase-seq (blue).

**E)** Aggregation of Spo11 activity in a 10 Kbp window centred on orientated TSSs in *S. cerevisiae*. Three example TSSs are shown orientated in the 5'-3' direction (top). A heatmap of all TSSs in the *S. cerevisiae* genome, with 25 rows stratified by gene expression level in SK1 cells (middle). The colour scale indicates average Spo11 break density. Motifs are also stratified into 4 quartiles of gene expression in meiotic SK1 cells, and the average distribution of Spo11 activity in each quartile plotted (bottom).

Figure S2

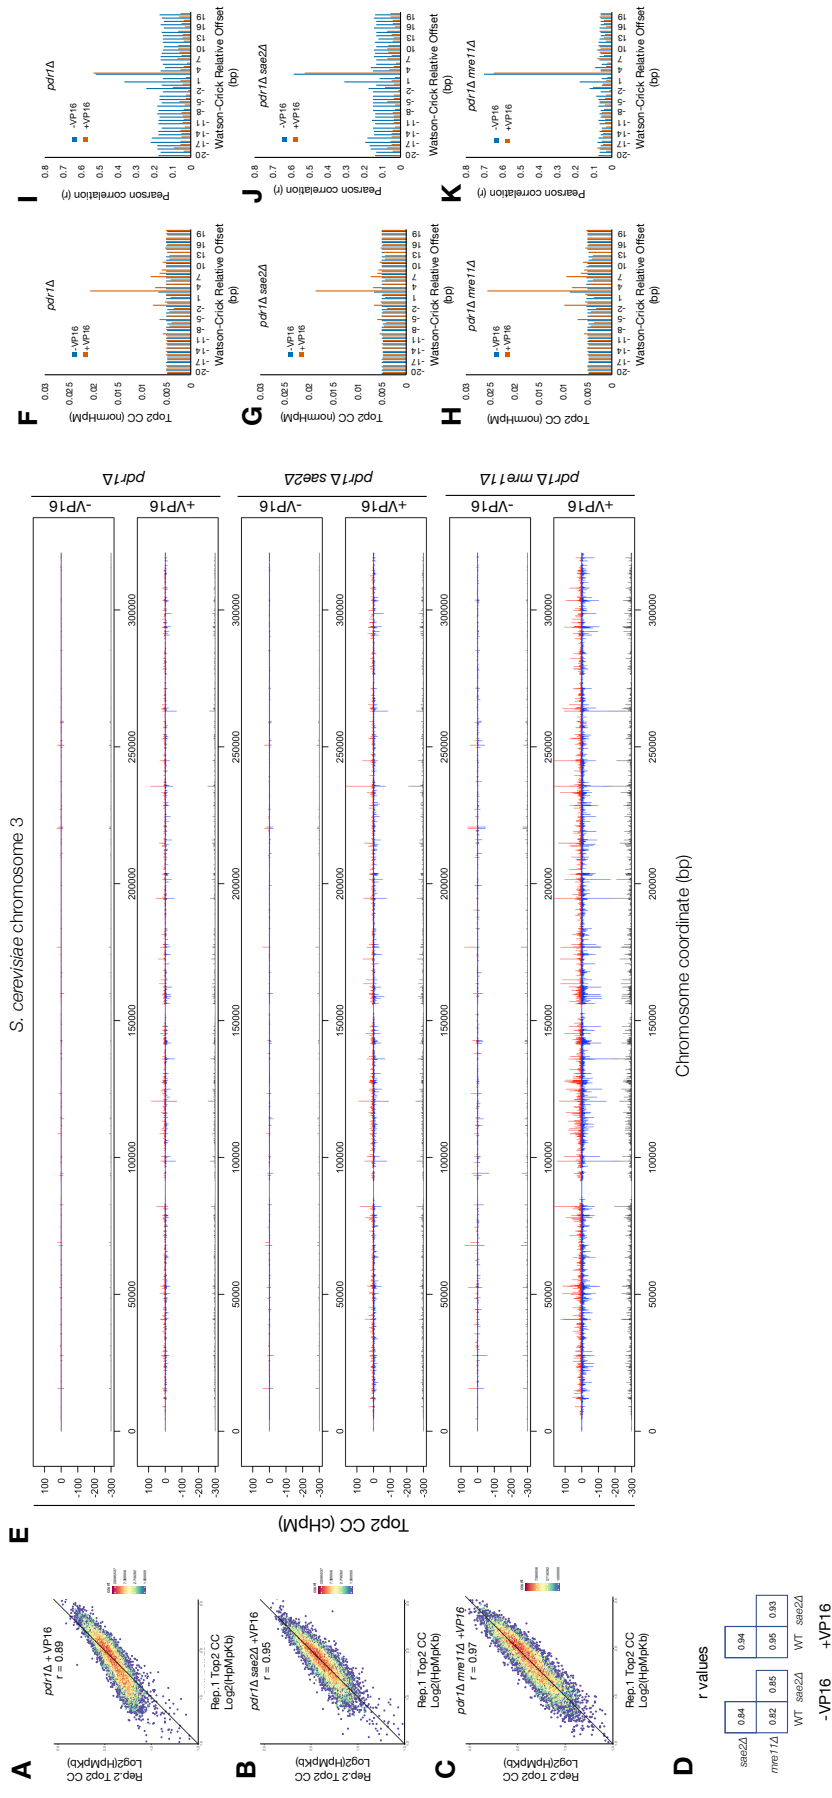

**Figure S2. CC-seq maps covalent Top2-linked DNA breaks in *S. cerevisiae* cycling cells with nucleotide accuracy (related to Figure 2).**

**A-C)** Correlation of 1 Kbp binned Top2 CC maps from *pdr1Δ* (A), *pdr1Δ sae2Δ* (B) and *pdr1Δ mre11Δ* (C) cells treated with VP16.

**D)** Pairwise Pearson correlation values for 100 bp binned Top2 CC maps from all assayed conditions. Each condition is a pool of two biological replicates.

**E)** Nucleotide-resolution *S. cerevisiae* Top2 CC map of chromosome 3 for all assayed conditions. Each condition is a pool of two biological replicates.

**F-H)** The normalised number of Top2 CCs retained in the *pdr1Δ* (F), *pdr1Δ sae2Δ* (G) and *pdr1Δ mre11Δ* (H) cells treated  $\pm$ VP16, after filtering to include only sites offset by the given number of base pairs. All data were normalised over a -100 to +100 bp window.

**I-K)** Pearson correlation ( $r$ ) of Top2 CC-seq signal on Watson and Crick strands, offset by the indicated distance in *pdr1Δ* (I), *pdr1Δ sae2Δ* (J) and *pdr1Δ mre11Δ* (K) cells treated  $\pm$ VP16.



Figure S3

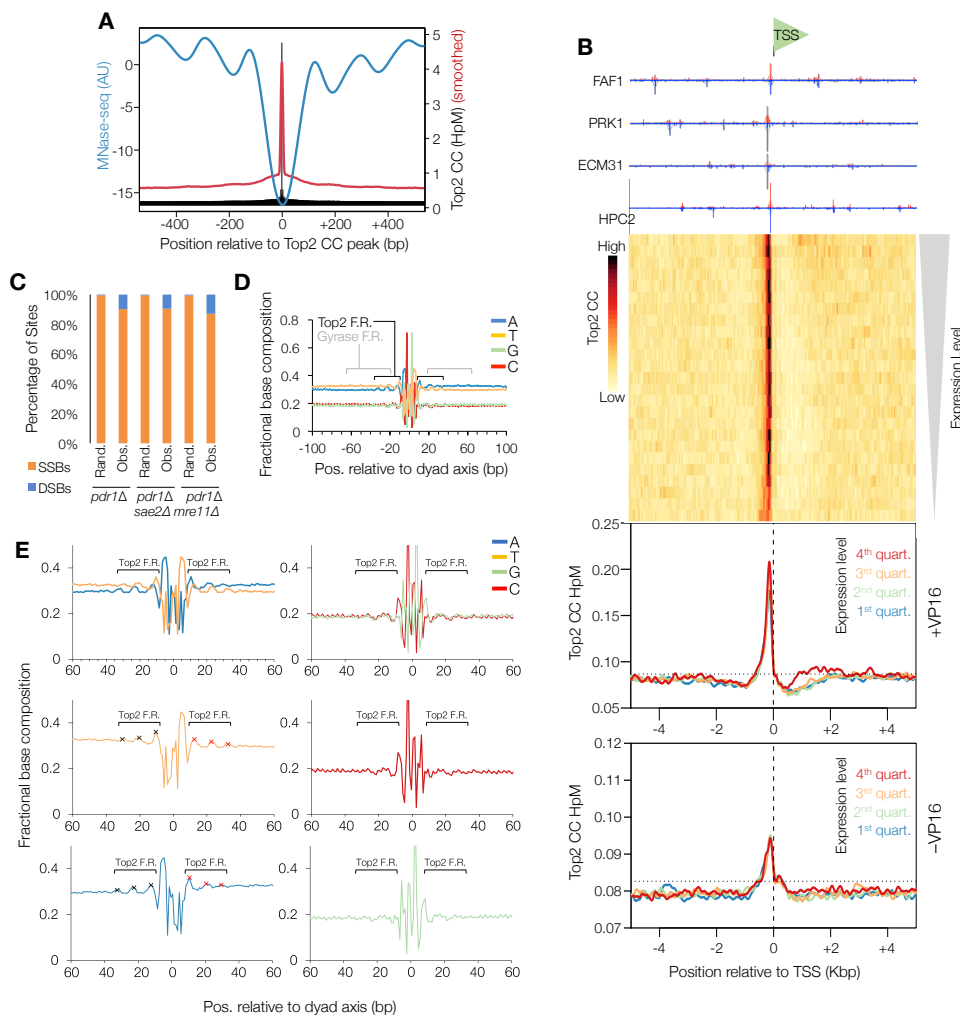

**Figure S3. Top2-linked DNA breaks in *S. cerevisiae* are not correlated with gene expression, anticorrelate with nucleosomes, and have biased nucleotide skews indicative of bent DNA (related to Figure 2)**

**A)** Top2 CC mapped by CC-seq (raw=black, or smoothed=red) anticorrelate with nucleosome occupancy measured by MNase-seq (blue). **B)** Aggregation of Top2 CCs in a 10 Kbp window centred on orientated transcription start sites (TSS) in *pdr1Δ S. cerevisiae*. Four example TSSs are shown orientated in the 5'-3' direction (top). Heatmap of all TSSs in the *S. cerevisiae* genome, with 25 rows stratified by gene expression level in vegetative growth (middle). Colour scale indicates average Top2 CC density. Motifs are also stratified into four quartiles of gene expression, and the average distribution of Top2 CCs in each quartile plotted for untreated and +VP16 conditions (bottom).

**C)** The percentage of strong sites that are SSBs and DSBs in etoposide-treated *pdr1Δ*, *pdr1Δsae2Δ* and *pdr1Δmre11Δ S. cerevisiae*. Sites were thresholded at 1 HpM prior to sorting into DSB or SSB classes based on presence or absence of a 3 bp offset cognate (Obs.). As a control, the amplitudes of Top2 CCs (HpM) were randomised amongst the positions in the nucleotide resolution datasets, prior to thresholding and offset analysis as described above (Rand.)

**D)** Average nucleotide composition over a 200 bp window centred on the DSB dyad axis, in etoposide-treated *pdr1Δ S. cerevisiae*. The position of the flanking regions (F.R.) identified in Gyrase mapping experiments, and the flanking regions observed here for Top2 are indicated in blue and black, respectively.

**E)** Average nucleotide composition over a 120 bp window centred on the DSB dyad axis, in etoposide-treated *pdr1Δ S. cerevisiae*. The signal pattern is separated into A+T and G+C (top left and right), and into individual A, T, C and G plots (middle left, bottom left, middle right, and bottom right, respectively). The position of the flanking regions (F.R.) observed here for Top2 are indicated in black, and their ~10.5 bp periodicity is highlighted with black and red crosses.

Figure S4

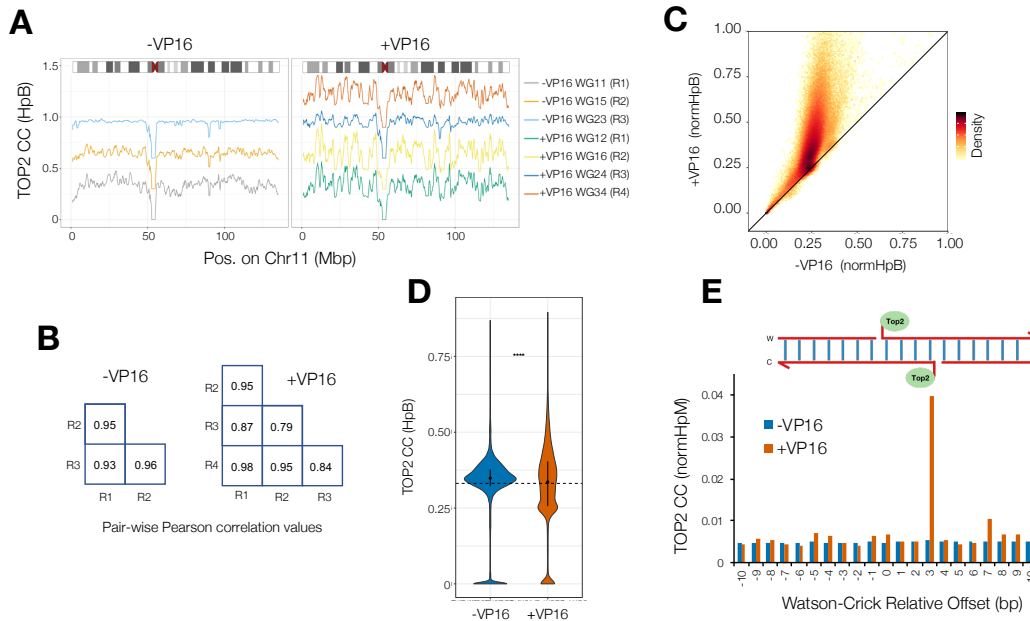

**Figure S4. CC-seq maps of TOP2-linked DNA breaks in Human cells are enriched by etoposide, and show high reproducibility and nucleotide accuracy (related to Figure 3)**

**A)** Broad-scale *H. sapiens* TOP2 CC-seq maps in individual biological replicates of RPE-1 cells  $\pm$ VP16. Raw data were binned at 100 Kbp prior to plotting. Each plot is offset on the y-axis by +0.3 HpB.

**B)** Replicate-to-replicate Pearson correlation values ( $r$ ) for 10 Kbp binned TOP2 CC-seq maps of RPE-1 cells  $\pm$ VP16.

**C)** Scatter plot of -VP16 and +VP16 TOP2 CC-seq maps binned at 10 Kbp resolution. Data were first scaled according to the estimated noise fraction (**Methods**), and are presented in a hexagonal-binned format, where the density of overplotting is indicated by the colour scale.

**D)** Violin plots of TOP2 CC-seq maps  $\pm$ VP16 binned at 100 Kbp resolution. The inner black bar, black dot, and dotted horizontal line indicate the interquartile range, median, and expected mean Top2 CC density based on random distribution.

**E)** The normalised number of TOP2 CCs retained in the CC-seq maps in RPE-1 cells  $\pm$ VP16 after filtering to include only sites offset by the given number of base pairs. Data were normalised over a -100 to +100 bp window.

Figure S5

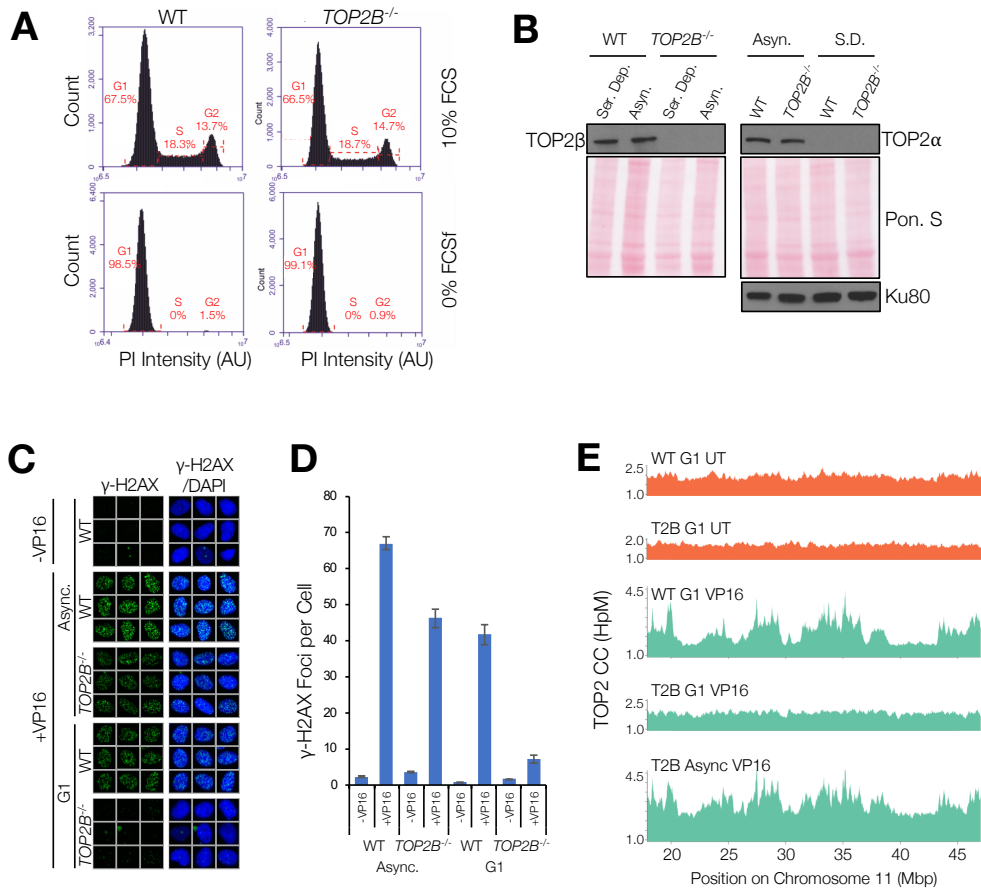

**Figure S5. CC-seq signal is TOP2-dependent**

**A**) DNA content histograms of wild type (WT) and *TOP2B*<sup>-/-</sup> RPE-1 cells under asynchronous (10% FCS) and serum-deprived (0% FCS) conditions, as measured by FACS following propidium iodide (PI) staining. G1, S and G2 populations are clearly present under asynchronous growing conditions. A strong G1 arrest is observed in serum deprived conditions. Percentages of cells in each of the indicated regions (red dotted brackets) are given.

**B**) Western blots demonstrating the absence of TOP2β protein in serum deprived and asynchronous *TOP2B*<sup>-/-</sup> RPE-1 cells (left), and the absence of TOP2α in serum deprived wild type and *TOP2B*<sup>-/-</sup> RPE-1 cells (right). Ponceau S total protein loading is presented (Pon. S) for the left and right panels, and additionally a Ku80 loading control is included for the right panel.

**C**) Immunofluorescence experiment demonstrating induction of γ-H2AX foci (green) in asynchronous (Async.) and serum-deprived (Ser. Dep.) wild type (WT) and *TOP2B*<sup>-/-</sup> RPE-1 cells, all co-stained with DAPI (blue). Galleries of nine cells per condition were chosen randomly using Olympus ScanR Analysis software.

**D**) Quantification of (C). Numbers of γ-H2AX foci per cell were counted automatically using Olympus ScanR Analysis software. The mean ±SEM is reported for n= 3 biological replicate experiments.

**E**) Broad-scale *H. sapiens* TOP2 CC-seq maps in asynchronous and serum-deprived wild type (WT) and *TOP2B*<sup>-/-</sup> RPE-1 cells -VP16 (orange) and +VP16 (green). Raw hits on Watson and Crick strands were summed and smoothed according to local signal density (Fsize=501).

Figure S6

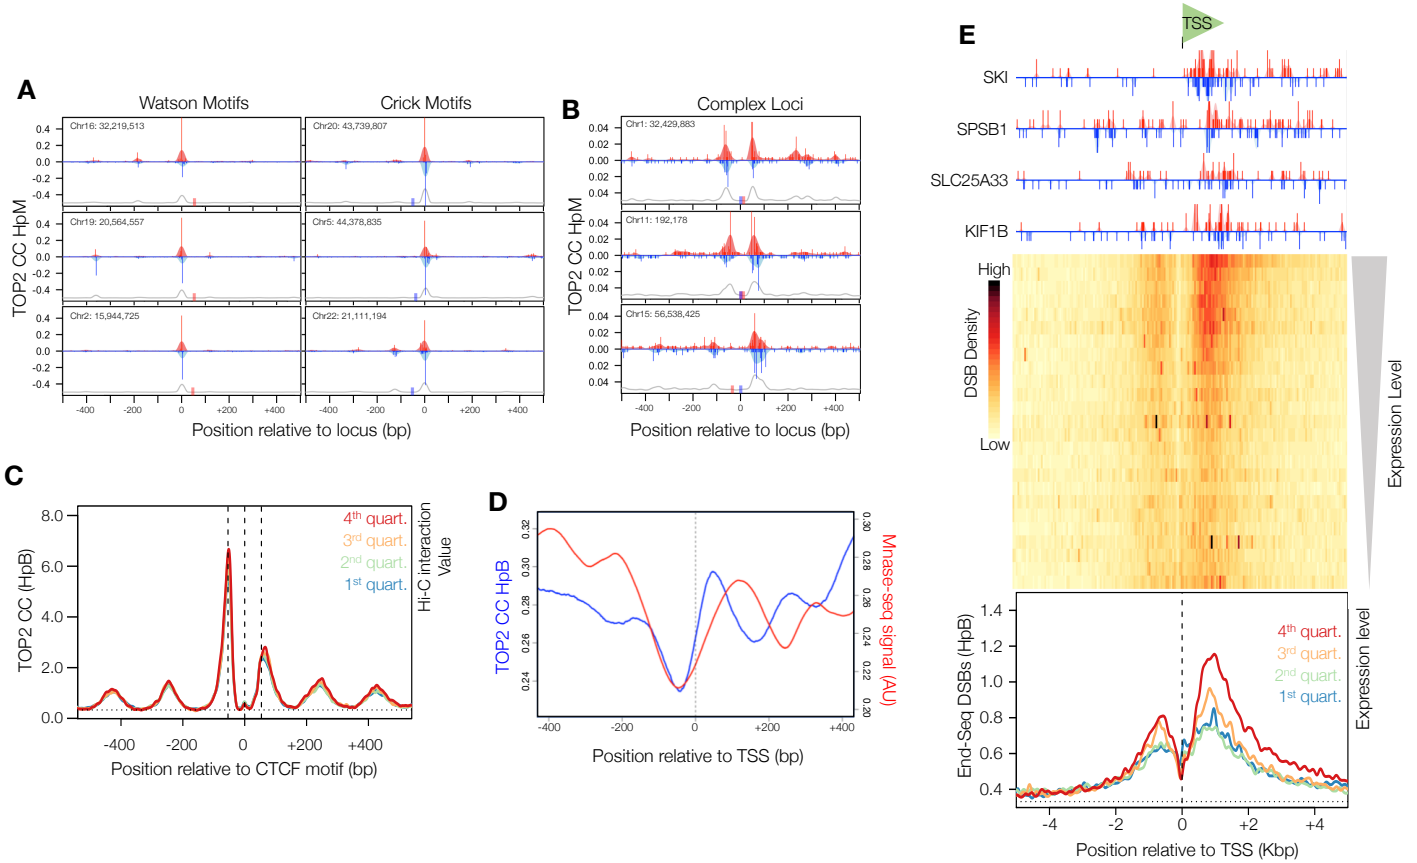

**Figure S6. TOP2 CC-seq signal enrichment around CTCF and TSS sites, compared with END-seq DSB signal at TSSs**

- A)** Fine-scale TOP2 CC-seq maps of *H. sapiens* CTCF-proximal loci in RPE-1 cells +VP16. Red and blue traces indicate TOP2-linked 5' DNA termini on the Watson and Crick strands, respectively. Pale shaded areas are the same data smoothed with a sliding 11 bp Hanning window. Red and Blue rectangles indicate the positions of CTCF motifs on the Watson and Crick strands respectively. The grey line indicates Hanning-smoothed sum of Watson and Crick TOP2 CCs.
- B)** Fine-scale mapping of TOP2 CCs surrounding three complex CTCF loci, processed as in (A).
- C)** Aggregation of TOP2 CCs in a 1 Kbp window centred on the subset of orientated CTCF motifs that can be assigned to a chromatin loop anchor in human RPE-1 cells (Darrow et al., 2016). Motifs are stratified into 4 quartiles of loop anchor interaction strength, and the average TOP2 CC distribution in each quartile plotted.
- D)** Fine-scale aggregation of TOP2 CCs (red) in a 800 bp window centred on TSSs in human RPE-1 cells, showing anticorrelation with aggregated MNase-seq signal (blue).
- E)** Aggregation of END-seq mapped DSBs in a 10 Kbp window centred on orientated TSSs in human MCF7 cells. Four example TSSs are shown orientated in the 5'-3' direction (top). A heatmap of all TSSs in the human genome, with 25 rows stratified by flanking gene expression level in MCF7 cells (middle). The colour scale indicates average END-seq DSB density. TSSs are also stratified into 4 quartiles based on strength of flanking gene expression, and the average END-seq DSB distribution in each quartile plotted (bottom).

Figure S7

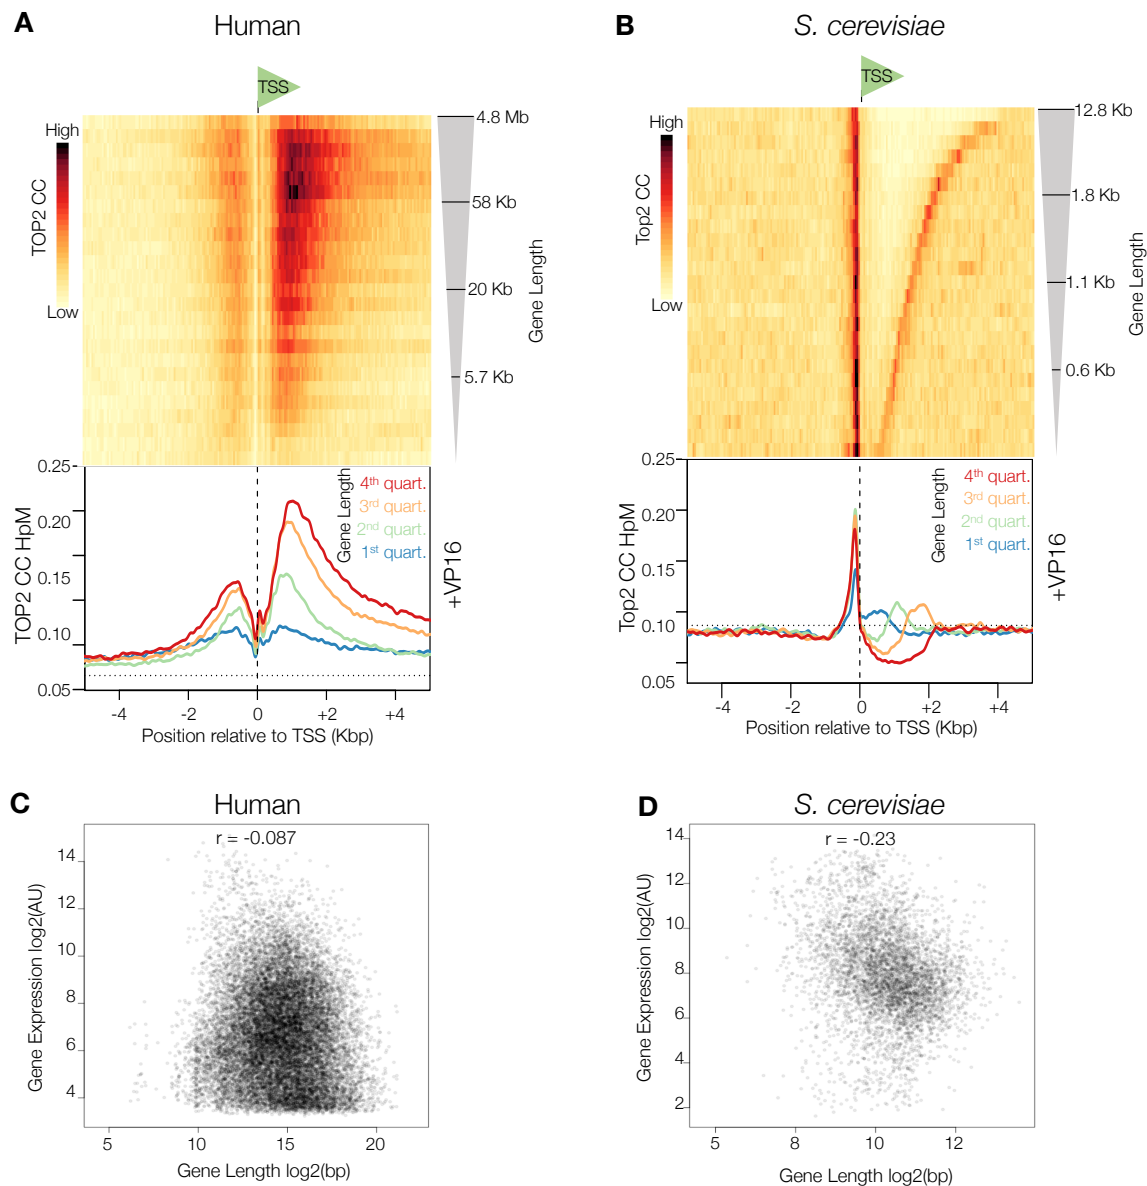

**Figure S7. TSS-proximal TOP2-linked DNA breaks in humans are correlated with gene length, independently from gene expression level (related to Figure 5); TSS-proximal Top2-linked DNA breaks in yeast are not strongly correlated with gene length, (related to Figure 2)**

**A)** Aggregation of TOP2 CCs in a 10 Kbp window centred on orientated TSSs in human RPE-1 cells. A heatmap of all TSSs in the human genome, with 25 rows stratified by gene length (top). The colour scale indicates average TOP2 CC density. Motifs are also stratified into 4 quartiles of gene length, and the average TOP2 CC distribution in each quartile plotted (bottom).

**B)** Aggregation of Top2 CCs in a 10 Kbp window centred on orientated transcription start sites (TSS) in *pdr1Δ S. cerevisiae*. Heatmap of all TSSs in the *S. cerevisiae* genome, with 25 rows stratified by gene length level (top). Colour scale indicates average Top2 CC density. Motifs are also stratified into four quartiles of gene length, and the average distribution of Top2 CCs in each quartile plotted (bottom).

**C)** Scatter plot of human gene length and RPE-1 gene expression, showing no correlation.

**D)** Scatter plot of *S. cerevisiae* gene length and gene expression during vegetative growth, showing little correlation.
